# Supplementary material for: Vanadium(v) phenolate complexes for ring opening homo- and co-polymerisation of ε-caprolactone, l-lactide and rac-lactide
Source: Royal Society of Chemistry journal article supplement (doi:10.1039/c5ra24816g), 2015-12-22
Supplement: c5ra24816g1.pdf [file c5ra24816g1.pdf]

Electronic Supporting Information for:

## Vanadyl phenolate complexes for ring opening homo- and co-polymerisation of $\epsilon$ -caprolactone, *L*-lactide and *rac*-lactide

Feijie Ge,<sup>[a]</sup> Yi Dan,<sup>[a]</sup> Yahya Al-Khafaji,<sup>[a]</sup> Timothy J. Prior,<sup>[b]</sup> Long Jiang<sup>\*[a]</sup>, Mark R.J. Elsegood<sup>[c]</sup> and Carl Redshaw<sup>\*[b, c]</sup>

+

<sup>a</sup> State Key Laboratory of Polymer Materials Engineering of China (Sichuan University), Polymer Research Institute of Sichuan University, Chengdu 610065, Sichuan, China.

<sup>b</sup> Department of Chemistry, University of Hull, Hull, HU6 7RX, UK.

<sup>c</sup> AstaTech Ltd, Chengdu, 611137, Sichuan, China.

Corresponding authors email address: [jianglong@scu.edu.cn](mailto:jianglong@scu.edu.cn) and [C.Redshaw@hull.ac.uk](mailto:C.Redshaw@hull.ac.uk)

### Contents

**Table S1.** H-bonding geometry in **6**.

**Figure S1.** ORTEP diagram of the asymmetric unit of complex **1** with ellipsoids drawn at 50 % probability level.

**Figure S2.** ORTEP diagram of complex **4** with ellipsoids drawn at 50 % probability level. Symmetry equivalent atoms are generated by the operator  $i = -x, 1-y, 1-z$ . In the interest of clarity, hydrogen atoms are omitted.

**Figure S3.** ORTEP diagram of the asymmetric unit of complex **5** with ellipsoids at 50 % probability level.

**Figure S4.** . ORTEP diagram of the asymmetric unit of complex **6.2CH<sub>2</sub>Cl<sub>2</sub>** with ellipsoids at 50 % probability level.

**Figure S5.** ORTEP diagram of the asymmetric unit of complex **6**·3CH<sub>2</sub>Cl<sub>2</sub> with ellipsoids at 50 % probability level.

**Figure S6.** ORTEP diagram of the asymmetric unit of complex **7** with ellipsoids at 50 % probability level.

**Table S2.** Crystallographic data for complexes **1**, **2**, **3**·2CH<sub>2</sub>Cl<sub>2</sub>, **4**·2CH<sub>2</sub>Cl<sub>2</sub>, **4**·3CH<sub>2</sub>Cl<sub>2</sub> and **5**·2MeCN.

**Figure S7.** <sup>1</sup>H NMR spectrum of the resulting PCL (run 3, table 3).

**Figure S8.** <sup>1</sup>H NMR spectrum of the resulting PCL (run 27, table 3).

**Figure S9.** MALDI-ToF spectrum of PCL (run 3, table 3).

**Figure S10.** MALDI-ToF spectrum of PCL (run 9, table 3).

**Figure S11.** MALDI-ToF spectrum of PCL (run 22, table 3).

**Figure S12.** MALDI-ToF spectrum of PCL (run 27, table 3).

**Figure S13.** MALDI-ToF spectrum of PCL (no solvent run 1, table 4).

**Figure S14.** MALDI-ToF spectrum of PCL (no solvent run 7, table 4).

**Figure S15.** Plot of <sup>51</sup>V NMR signal (from Table 2) *versus* catalytic activity.

**Figure S16.** MALDI-ToF spectrum of PLA (run 1, table 5).

**Figure S17.** MALDI-ToF spectrum of PLA (run 10, table 5).

**Figure S18.** MALDI-ToF spectrum of PLA (run 24, table 5).

**Figure S19.** MALDI-ToF spectrum of PLA (run x, table 6).

**Figure S20.** 2D J-resolved <sup>1</sup>H NMR spectrum of PLA (run 1, table 6).

**Figure S21.** 2D J-resolved <sup>1</sup>H NMR spectrum of PLA (run 5, table 6).

**Figure S22.** 2D J-resolved <sup>1</sup>H NMR spectrum of PLA (run 17, table 6).

**Figure S23.** <sup>1</sup>H NMR spectrum of co-polymer from CL and *L*-LA (run 4, table 7).

**Figure S24.** DSC plot of co-polymer from CL and *L*-LA (run 4, table 7).

**Figure S25.** <sup>1</sup>H NMR spectrum of co-polymer from CL and *rac*-LA (run 6, table 8).

**Figure S26.** DSC plot of co-polymer from CL and *rac*-LA (run 4, table 8).

**Figure S 27.** GPC run 1 table 7.

**Figure S 28.** GPC run 2 table 7.

**Figure S 29.** GPC run 3 table 7.

**Figure S 30.** GPC run 4 table 7.

**Figure S 31.** GPC run 5 table 7.

**Figure S 32.** GPC run 6 table 7.

**Figure S 33.** GPC run 7 table 7.

**Figure S 34.** GPC run 1 table 8.

**Figure S 35.** GPC run 2 table 8.

**Figure S 36.** GPC run 3 table 8.

**Figure S 37.** GPC run 4 table 8.

**Figure S 38.** GPC run 5 table 8.

**Figure S 39.** GPC run 6 table 8.

**Figure S 40.** GPC run 7table 8.

| $D-H\cdots A$       | $D-H$ | $H\cdots A$ | $D\cdots A$ | $D-H\cdots A$ |
|---------------------|-------|-------------|-------------|---------------|
| $C73-H73A\cdots O7$ | 0.99  | 2.23        | 3.09 (2)    | 144           |

**Table S1.** H-bonding geometry in **6**.

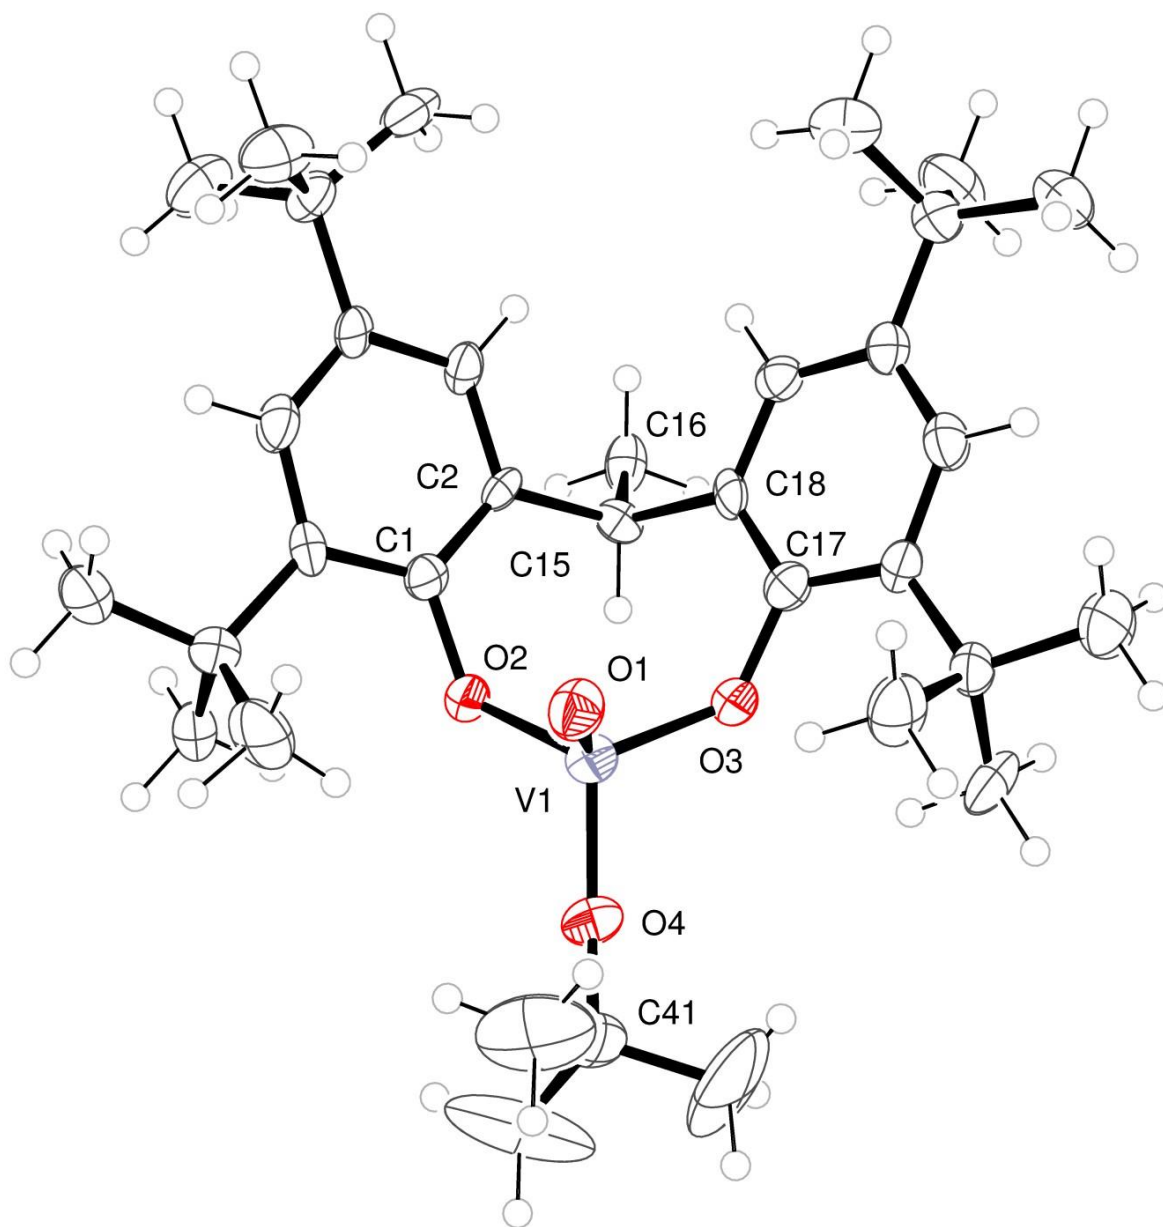

**Figure S1.** ORTEP diagram of the asymmetric unit of complex **1** with ellipsoids drawn at 50 % probability level.

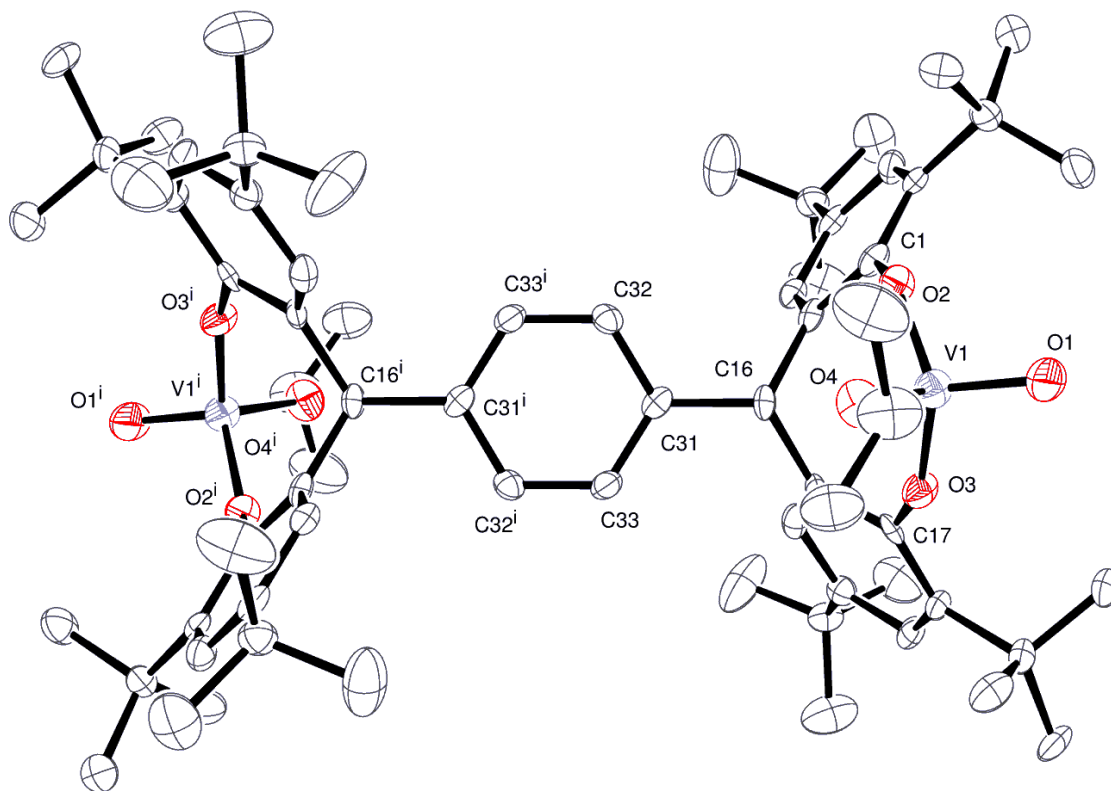

**Figure S2.** ORTEP diagram of complex **4** with ellipsoids drawn at 50 % probability level. Symmetry equivalent atoms are generated by the operator  $i = -x, 1-y, 1-z$ . In the interest of clarity, hydrogen atoms are omitted.

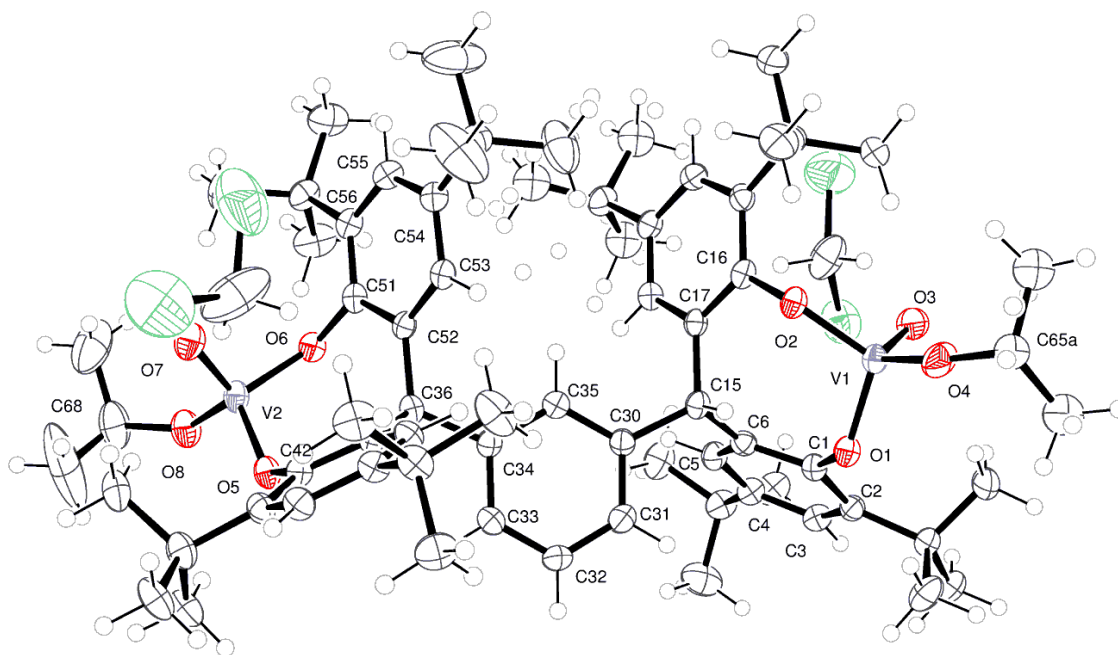

**Figure S3.** ORTEP diagram of the asymmetric unit of complex **5** with ellipsoids at 50 % probability level.

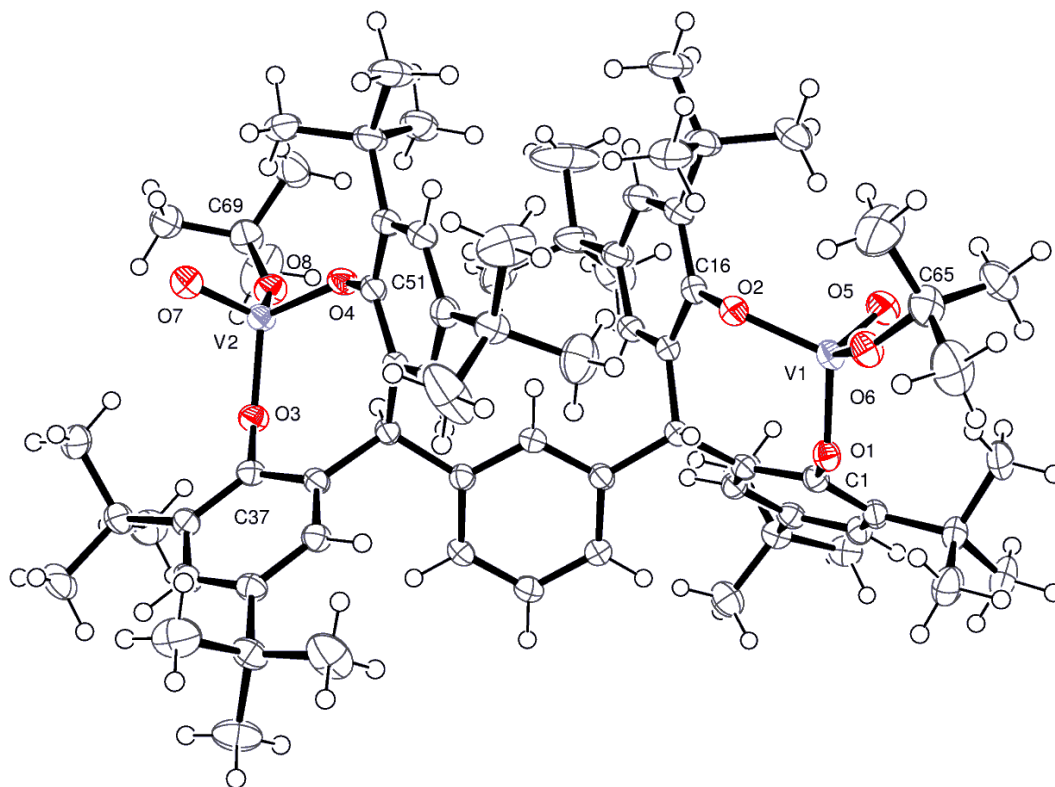

**Figure S4.** ORTEP diagram of the asymmetric unit of complex **6.2CH<sub>2</sub>Cl<sub>2</sub>** with ellipsoids at 50 % probability level.

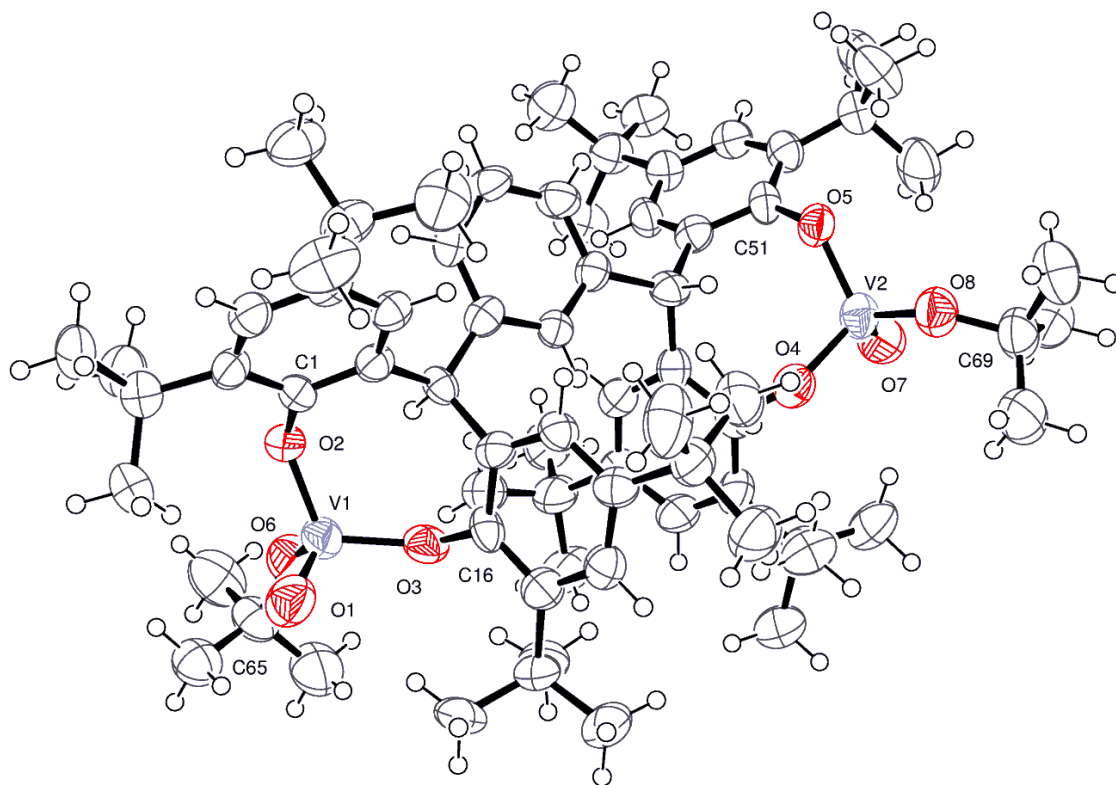

**Figure S5.** ORTEP diagram of the asymmetric unit of complex **6.3CH<sub>2</sub>Cl<sub>2</sub>** with ellipsoids at 50 % probability level.

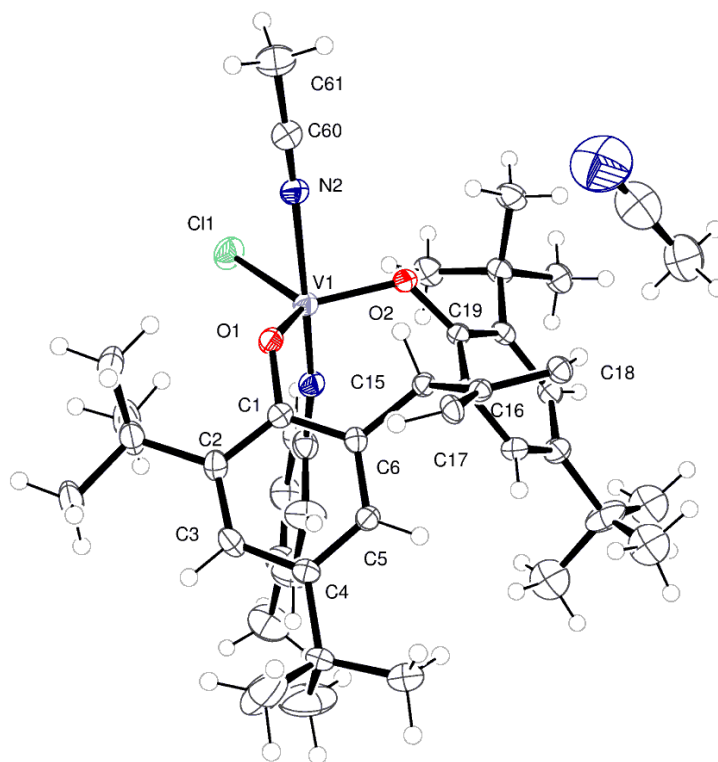

**Figure S6.** ORTEP diagram of the asymmetric unit of complex **7** with ellipsoids at 50 % probability level.

| Compound                                                                     | <b>1</b>                                         | <b>2</b>                                                       | <b>3·2CH<sub>2</sub>Cl<sub>2</sub></b>                                                              |
|------------------------------------------------------------------------------|--------------------------------------------------|----------------------------------------------------------------|-----------------------------------------------------------------------------------------------------|
| Formula                                                                      | C <sub>34</sub> H <sub>53</sub> O <sub>2</sub> V | C <sub>70</sub> H <sub>100</sub> O <sub>8</sub> V <sub>2</sub> | C <sub>70</sub> H <sub>100</sub> O <sub>8</sub> V <sub>2</sub> ·2(CH <sub>2</sub> Cl <sub>2</sub> ) |
| Formula weight                                                               | 576.70                                           | 1171.37                                                        | 1339.21                                                                                             |
| Crystal system                                                               | Monoclinic                                       | Monoclinic                                                     | Orthorhombic                                                                                        |
| Space group                                                                  | <i>P2<sub>1</sub>/c</i>                          | <i>P2<sub>1</sub>/c</i>                                        | <i>Pbca</i>                                                                                         |
| <i>a</i> (Å)                                                                 | 13.886(8)                                        | 10.967(4)                                                      | 11.0268(7)                                                                                          |
| <i>b</i> (Å)                                                                 | 23.550(14)                                       | 10.344(3)                                                      | 19.1028(13)                                                                                         |
| <i>c</i> (Å)                                                                 | 10.938(7)                                        | 27.9706(10)                                                    | 70.103(5)                                                                                           |
| <i>α</i> (°)                                                                 |                                                  |                                                                | 90                                                                                                  |
| <i>β</i> (°)                                                                 | 110.492(8)                                       | 92.329(6)                                                      | 90                                                                                                  |
| <i>γ</i> (°)                                                                 |                                                  |                                                                | 90                                                                                                  |
| <i>V</i> (Å <sup>3</sup> )                                                   | 3351(4)                                          | 3170.4(15)                                                     | 14766.7(17)                                                                                         |
| <i>Z</i>                                                                     | 4                                                | 2                                                              | 8                                                                                                   |
| Temperature (K)                                                              | 150(2)                                           | 100(2)                                                         | 100(2)                                                                                              |
| Wavelength (Å)                                                               | 0.71075                                          | 0.71075                                                        | 0.71075                                                                                             |
| Calculated density (g·cm <sup>-3</sup> )                                     | 1.143                                            | 1.227                                                          | 1.205                                                                                               |
| Absorption coefficient (mm <sup>-1</sup> )                                   | 0.329                                            | 0.349                                                          | 0.448                                                                                               |
| Transmission factors (min./max.)                                             | 0.502 and 1.000                                  | 0.600 and 1.000                                                | 0.682 and 1.000                                                                                     |
| Crystal size (mm)                                                            | 0.06 × 0.01 × 0.01                               | 0.09 × 0.03 × 0.01                                             | 0.27 × 0.10 × 0.02                                                                                  |
| <i>θ</i> (max) (°)                                                           | 25.171                                           | 25.095                                                         | 27.507                                                                                              |
| Reflections measured                                                         | 37155                                            | 17727                                                          | 91884                                                                                               |
| Unique reflections                                                           | 5977                                             | 5568                                                           | 16405                                                                                               |
| <i>R</i> <sub>int</sub>                                                      | 0.3338                                           | 0.1786                                                         | 0.0794                                                                                              |
| Reflections with <i>F</i> <sup>2</sup> > 2σ( <i>F</i> <sup>2</sup> )         | 2250                                             | 2591                                                           | 11323                                                                                               |
| Number of parameters                                                         | 368                                              | 372                                                            | 763                                                                                                 |
| <i>R</i> <sub>1</sub> [ <i>F</i> <sup>2</sup> > 2σ( <i>F</i> <sup>2</sup> )] | 0.0922                                           | 0.0987                                                         | 0.0723                                                                                              |
| <i>wR</i> <sub>2</sub> (all data)                                            | 0.2193                                           | 0.2427                                                         | 0.2255                                                                                              |
| GOOF, <i>S</i>                                                               | 1.016                                            | 1.058                                                          | 1.043                                                                                               |
| Largest difference peak and hole (e Å <sup>-3</sup> )                        | 0.323 and -0.321                                 | 0.585 and -0.489                                               | 0.624 and -1.154                                                                                    |



| Compound                                                                     | 4·2CH <sub>2</sub> Cl <sub>2</sub>                                                                  | 4·3CH <sub>2</sub> Cl <sub>2</sub>                                                                  | 5·2MeCN                                                                                                |
|------------------------------------------------------------------------------|-----------------------------------------------------------------------------------------------------|-----------------------------------------------------------------------------------------------------|--------------------------------------------------------------------------------------------------------|
| Formula                                                                      | C <sub>72</sub> H <sub>104</sub> O <sub>8</sub> V <sub>2</sub> ·2(CH <sub>2</sub> Cl <sub>2</sub> ) | C <sub>71</sub> H <sub>102</sub> O <sub>8</sub> V <sub>2</sub> ·3(CH <sub>2</sub> Cl <sub>2</sub> ) | C <sub>82</sub> H <sub>106</sub> Cl <sub>2</sub> N <sub>4</sub> O <sub>4</sub> V <sub>2</sub> ·2(MeCN) |
| Formula weight                                                               | 1369.28                                                                                             | 1440.18                                                                                             | 1466.59                                                                                                |
| Crystal system                                                               | Monoclinic                                                                                          | Monoclinic                                                                                          | Monoclinic                                                                                             |
| Space group                                                                  | <i>P</i> 2 <sub>1</sub> / <i>n</i>                                                                  | <i>P</i> 2 <sub>1</sub> / <i>n</i>                                                                  | <i>P</i> 2 <sub>1</sub> / <i>n</i>                                                                     |
| <i>a</i> (Å)                                                                 | 21.4616(15)                                                                                         | 21.479(15)                                                                                          | 10.6773(7)                                                                                             |
| <i>b</i> (Å)                                                                 | 14.3723(10)                                                                                         | 14.382(9)                                                                                           | 18.5913(13)                                                                                            |
| <i>c</i> (Å)                                                                 | 25.6780(18)                                                                                         | 25.952(18)                                                                                          | 21.2520(15)                                                                                            |
| $\alpha$ (°)                                                                 |                                                                                                     |                                                                                                     | 90                                                                                                     |
| $\beta$ (°)                                                                  | 104.267(1)                                                                                          | 103.682(7)                                                                                          | 96.0750(10)                                                                                            |
| $\gamma$ (°)                                                                 |                                                                                                     |                                                                                                     | 90                                                                                                     |
| <i>V</i> (Å <sup>3</sup> )                                                   | 7676.2(9)                                                                                           | 7789(9)                                                                                             | 4194.9(5)                                                                                              |
| <i>Z</i>                                                                     | 4                                                                                                   | 4                                                                                                   | 2                                                                                                      |
| Temperature (K)                                                              | 100                                                                                                 | 100                                                                                                 | 100(2)                                                                                                 |
| Wavelength (Å)                                                               | 0.71073                                                                                             | 0.6889                                                                                              | 0.71073                                                                                                |
| Calculated density (g·cm <sup>-3</sup> )                                     | 1.185                                                                                               | 1.228                                                                                               | 1.161                                                                                                  |
| Absorption coefficient (mm <sup>-1</sup> )                                   | 0.43                                                                                                | 0.46                                                                                                | 0.337                                                                                                  |
| Transmission factors (min./max.)                                             | 0.678 and 1.000                                                                                     | 0.947 and 0.982                                                                                     | 0.754 and 1.000                                                                                        |
| Crystal size (mm)                                                            | 0.10 × 0.07 × 0.02                                                                                  | 0.12 × 0.05 × 0.04                                                                                  | 0.20 × 0.03 × 0.03                                                                                     |
| $\theta$ (max) (°)                                                           | 27.5                                                                                                | 22.5                                                                                                | 27.609                                                                                                 |
| Reflections measured                                                         | 91396                                                                                               | 50369                                                                                               | 14230                                                                                                  |
| Unique reflections                                                           | 17489                                                                                               | 11066                                                                                               | 14230                                                                                                  |
| <i>R</i> <sub>int</sub>                                                      | 0.073                                                                                               | 0.196                                                                                               | 0.0798                                                                                                 |
| Reflections with <i>F</i> <sup>2</sup> > 2σ( <i>F</i> <sup>2</sup> )         | 13364                                                                                               | 6500                                                                                                | 12276                                                                                                  |
| Number of parameters                                                         | 794                                                                                                 | 889                                                                                                 | 453                                                                                                    |
| <i>R</i> <sub>1</sub> [ <i>F</i> <sup>2</sup> > 2σ( <i>F</i> <sup>2</sup> )] | 0.054                                                                                               | 0.128                                                                                               | 0.0736                                                                                                 |
| <i>wR</i> <sub>2</sub> (all data)                                            | 0.162                                                                                               | 0.370                                                                                               | 0.1911                                                                                                 |
| GOOF, <i>S</i>                                                               | 1.04                                                                                                | 1.03                                                                                                | 1.109                                                                                                  |
| Largest difference peak and hole (e Å <sup>-3</sup> )                        | 0.86 and -0.41                                                                                      | 0.78 and -0.67                                                                                      | 0.808 and -0.535                                                                                       |

**Table S2.** Crystallographic data for complexes **1**, **2**, **3**·2CH<sub>2</sub>Cl<sub>2</sub>, **4**·2CH<sub>2</sub>Cl<sub>2</sub>, **4**·3CH<sub>2</sub>Cl<sub>2</sub> and **5**·2MeCN.

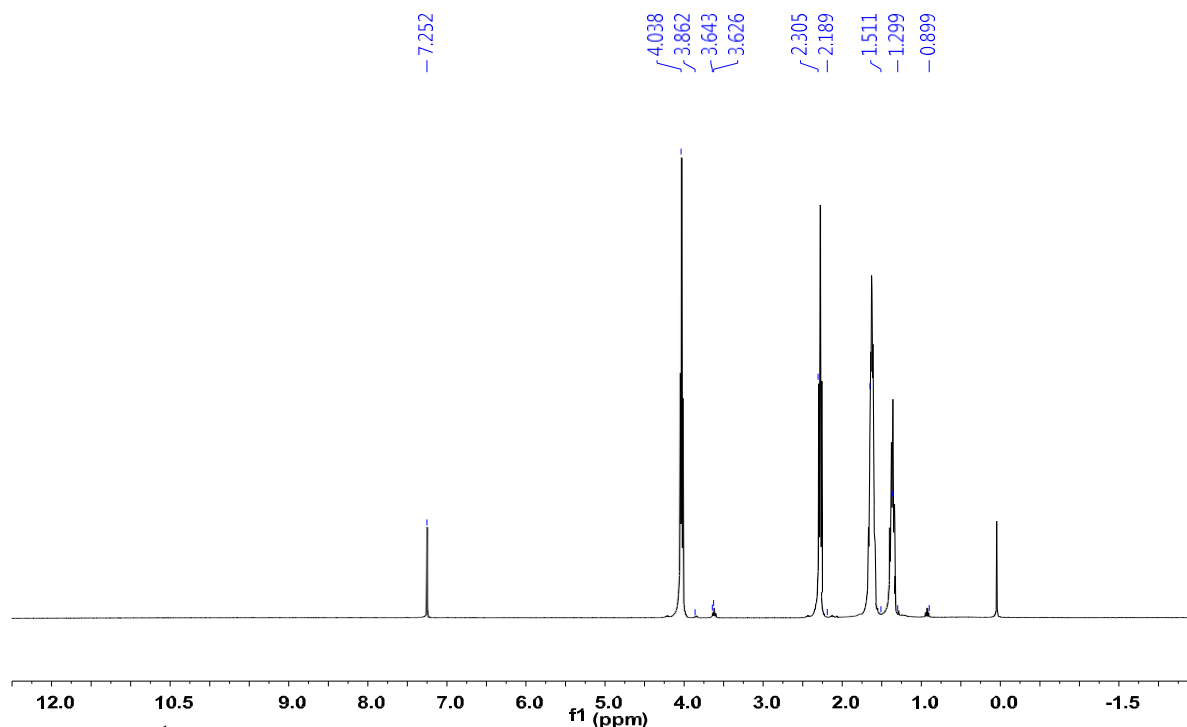

**Figure S7.** <sup>1</sup>H NMR spectrum of the resulting PCL (run 3, table 3).

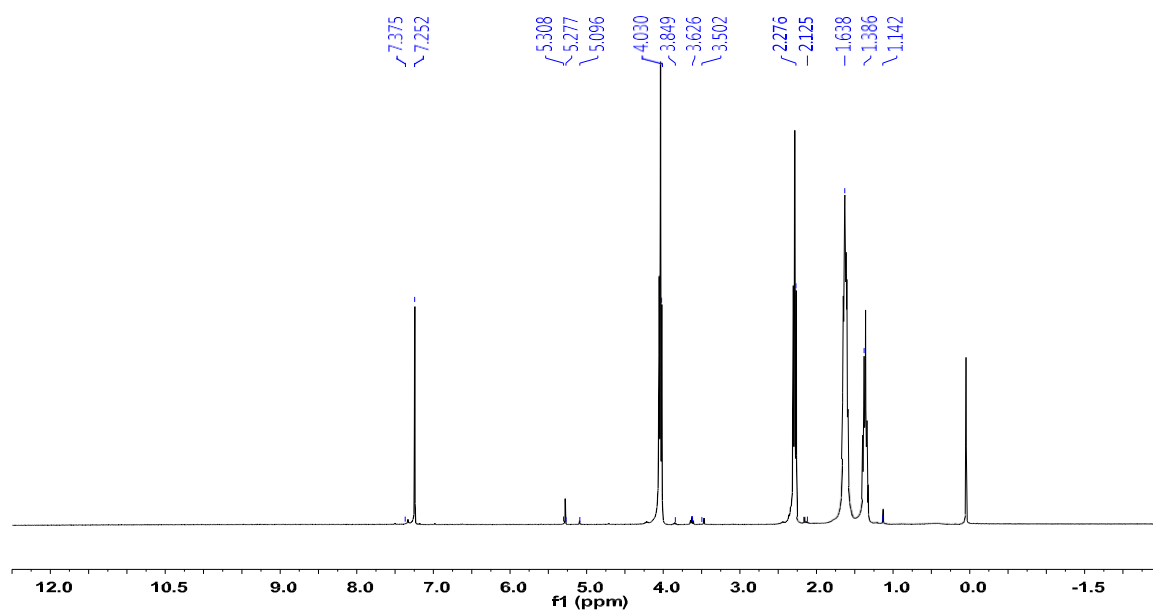

**Figure S8.** <sup>1</sup>H NMR spectrum of the resulting PCL (run 27, table 3).

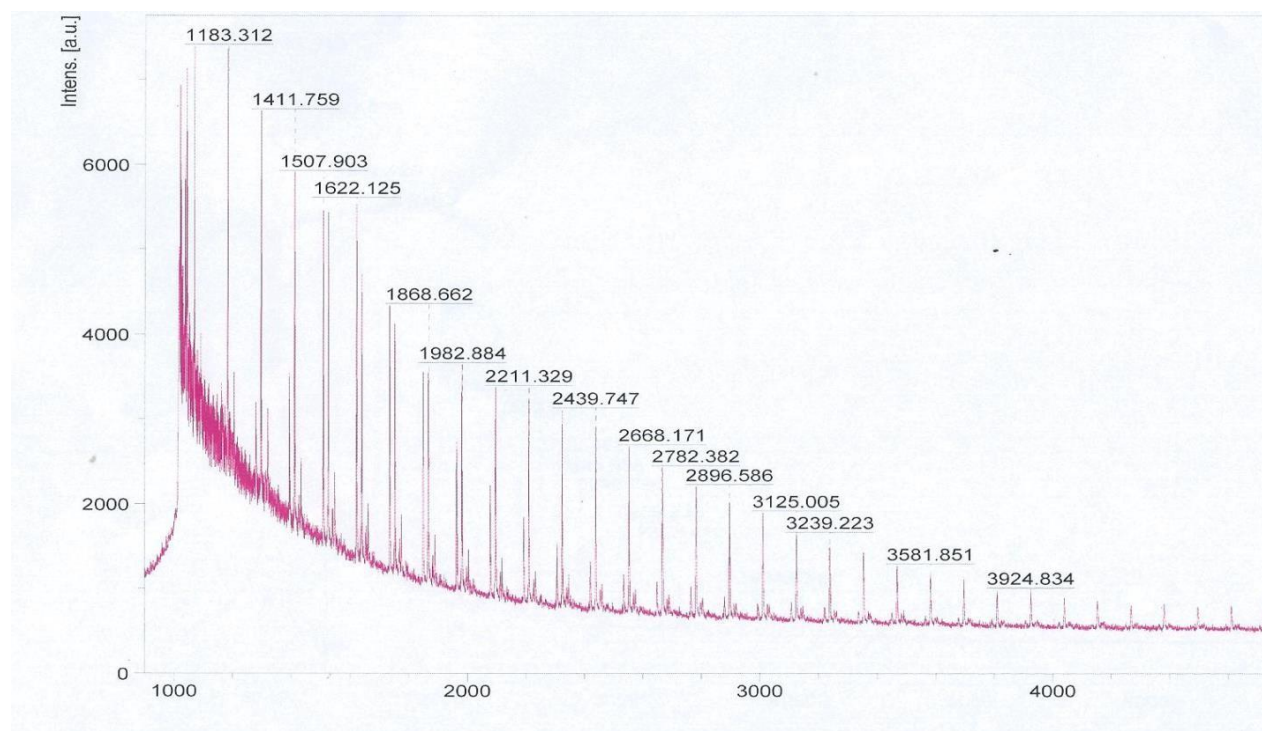

**Figure S9.** MALDI-ToF spectrum of PCL (run 3, table 3).

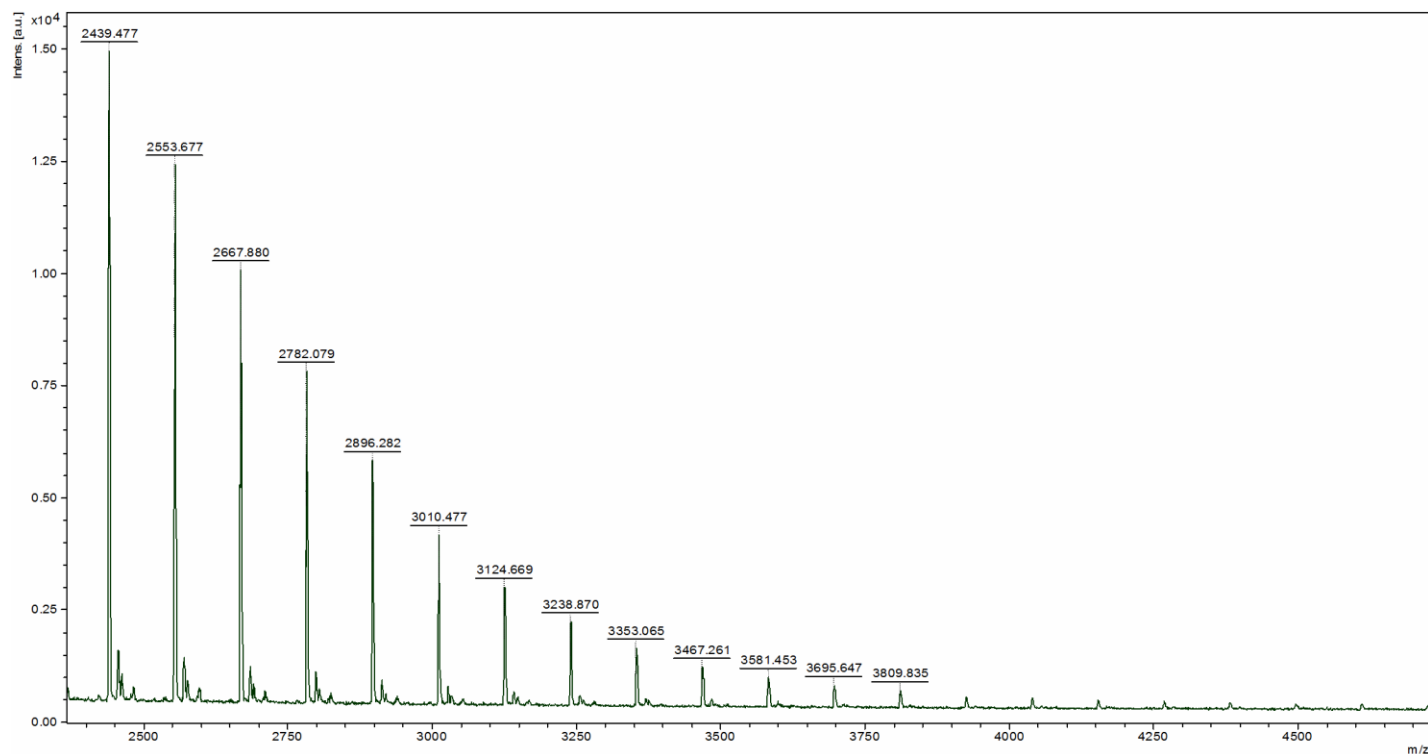

**Figure S10.** MALDI-ToF spectrum of PCL (run 9, table 3).

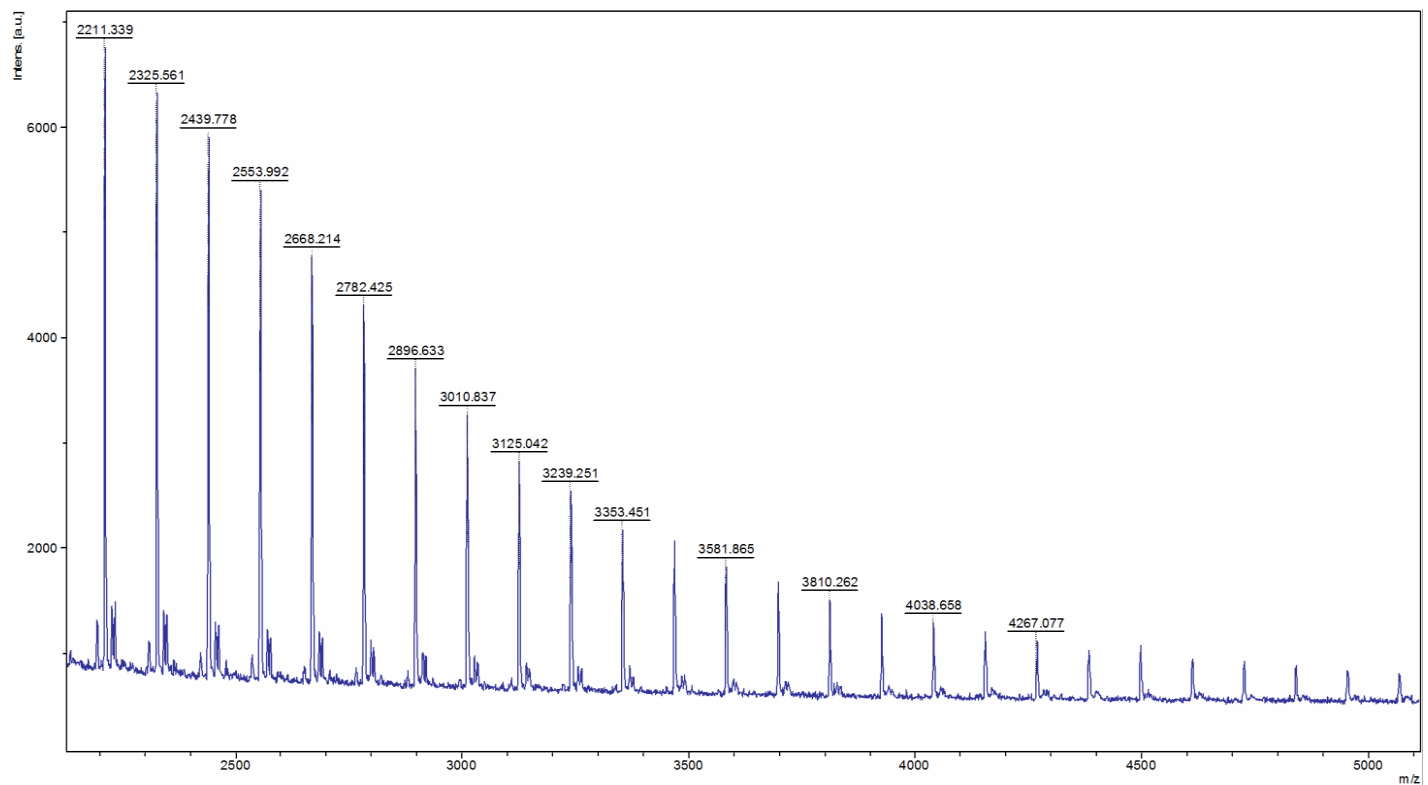

**Figure S11.** MALDI-ToF spectrum of PCL (run 22, table 3).

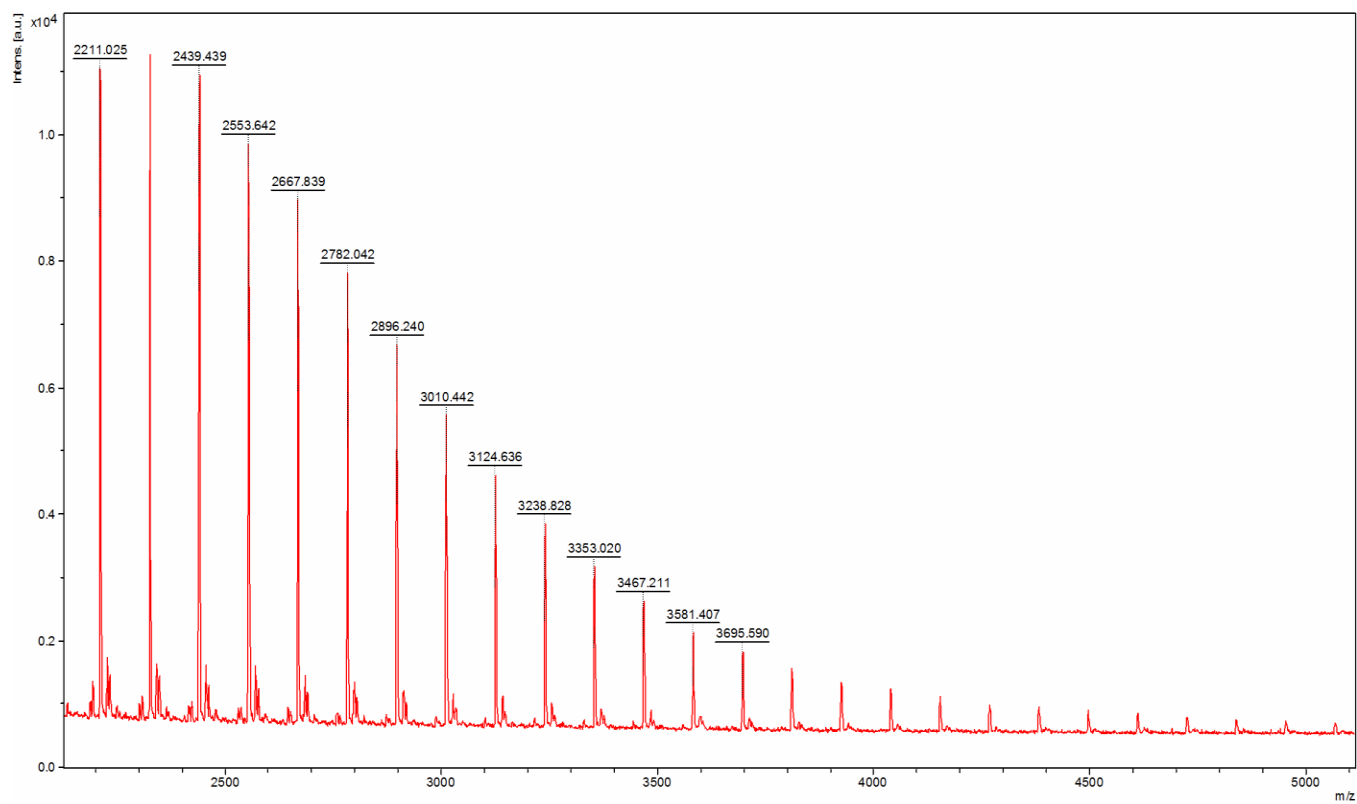

**Figure S12.** MALDI-ToF spectrum of PCL (run 27, table 3).

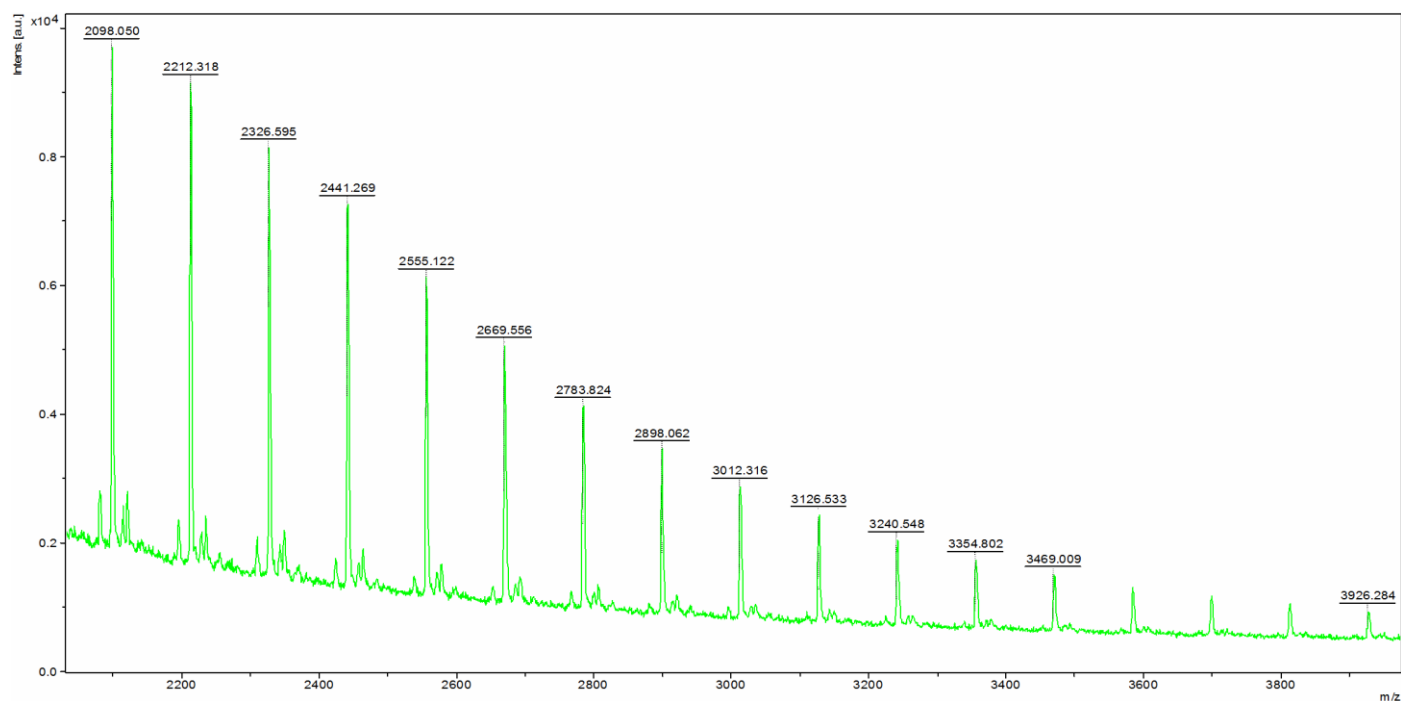

**Figure S13.** MALDI-ToF spectrum of PCL (no solvent run 1, table 4).

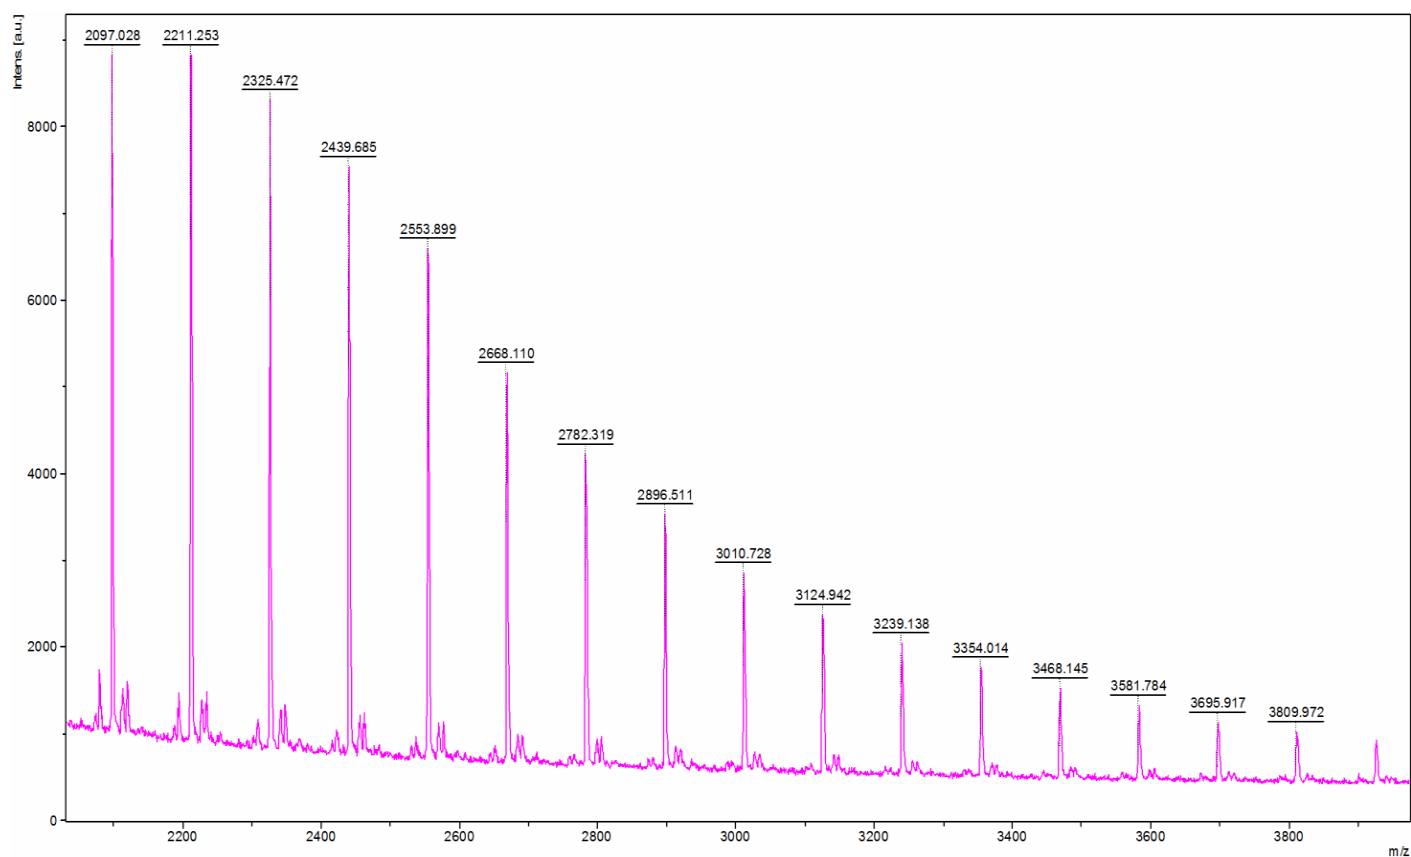

**Figure S14.** MALDI-ToF spectrum of PCL (no solvent run 7, table 4).

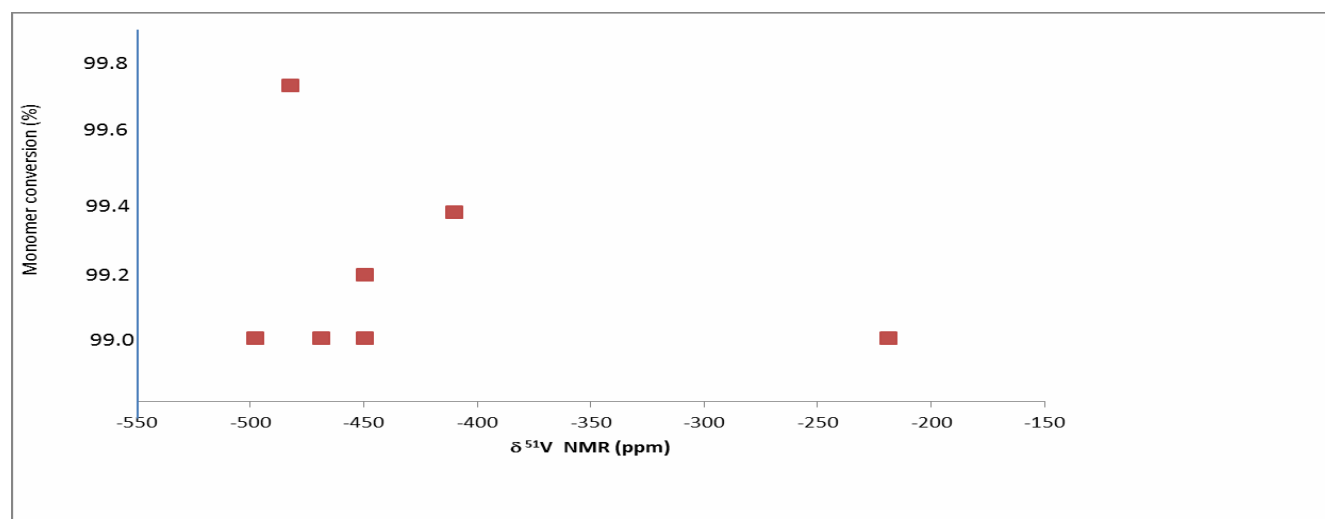

**Figure S15.** Plot of  $^{51}\text{V}$  NMR signal (from Table 2) *versus* catalytic activity.

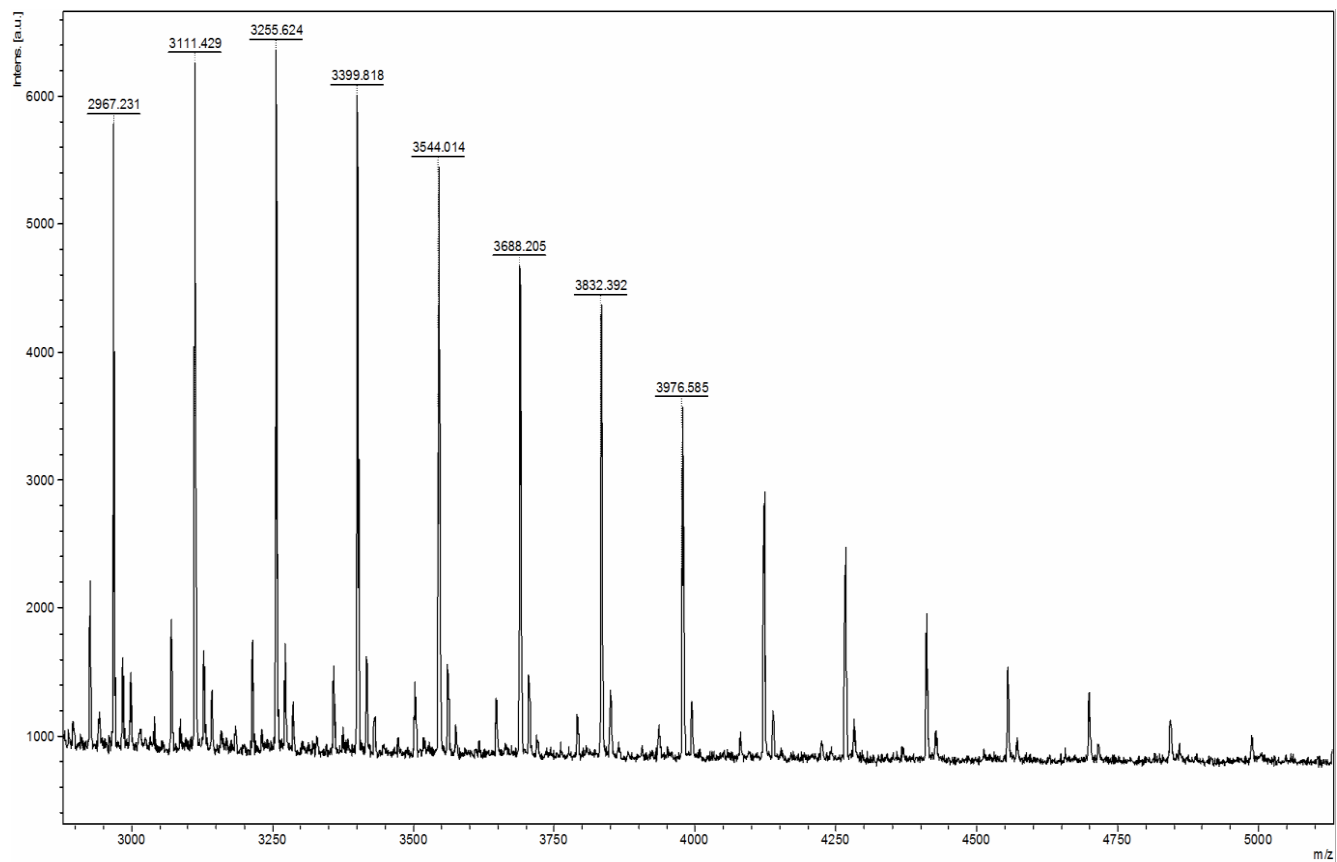

**Figure S16.** MALDI-ToF spectrum of PLA (run 1, table 5).

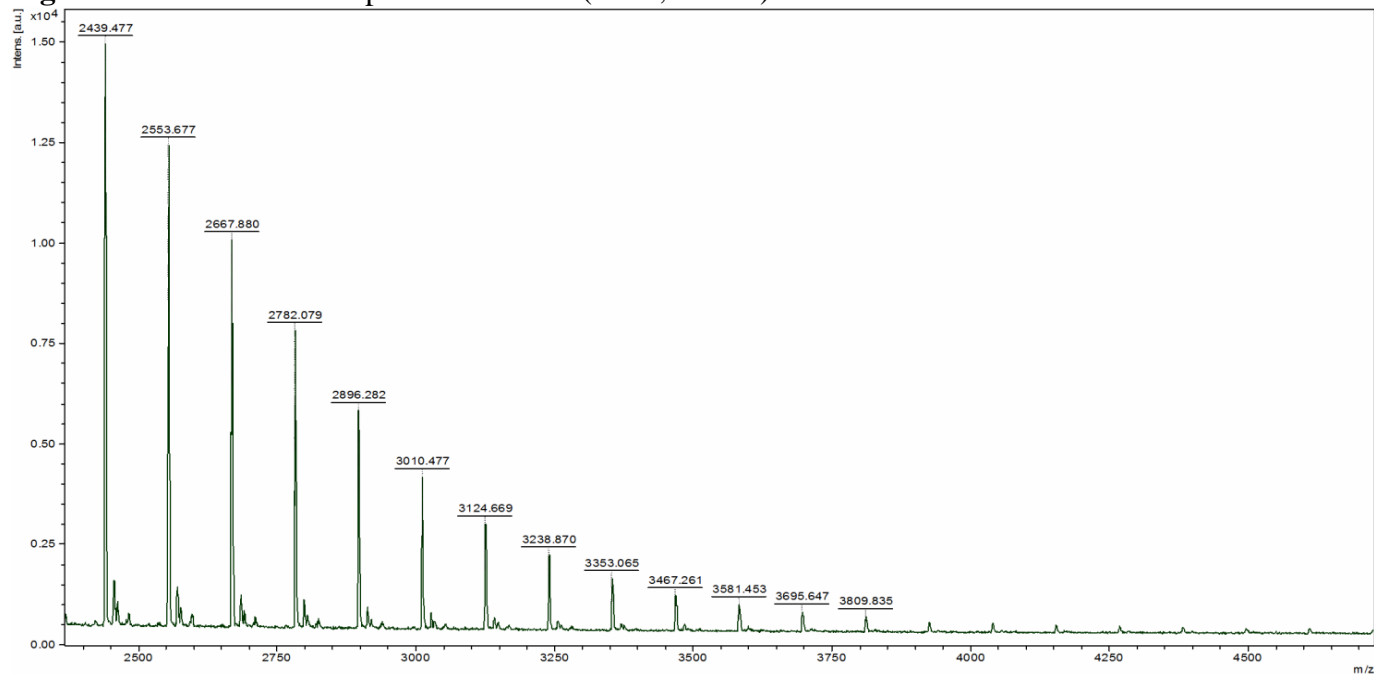

**Figure S17.** MALDI-ToF spectrum of PLA (run 10, table 5).

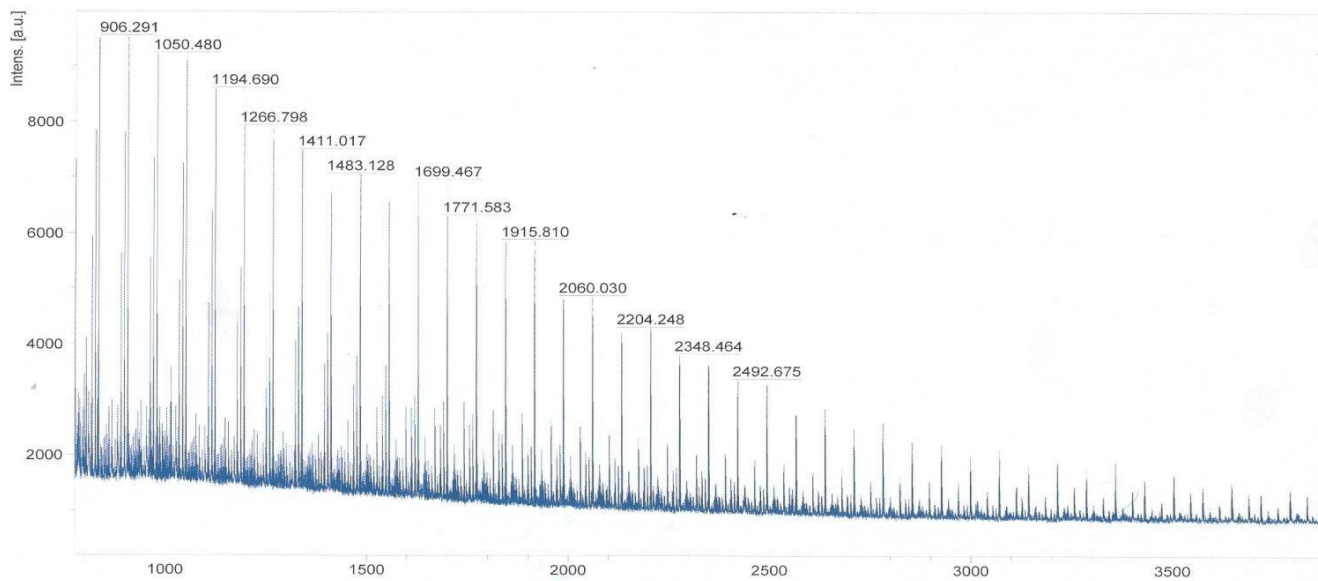

**Figure S18.** MALDI-ToF spectrum of PLA (run 24, table 5).

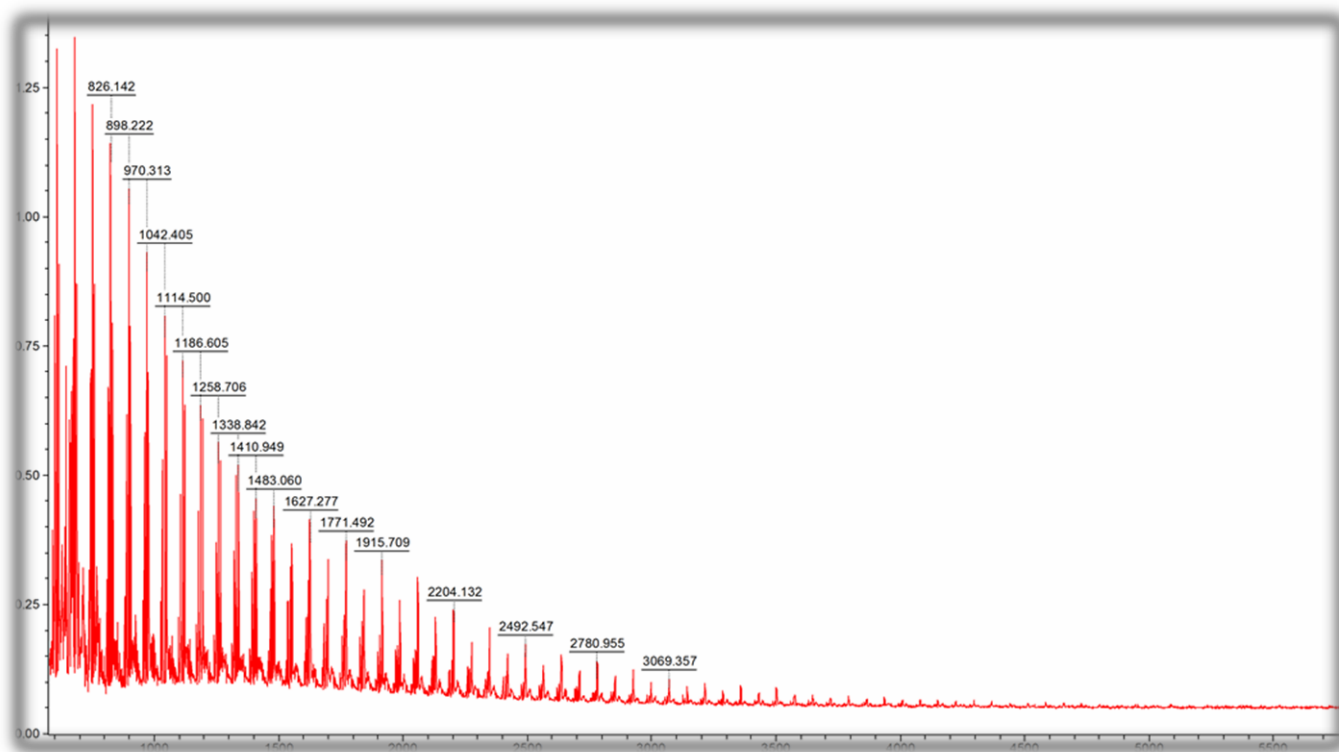

**Figure S19.** MALDI-ToF spectrum of PLA (run 19, table 6).

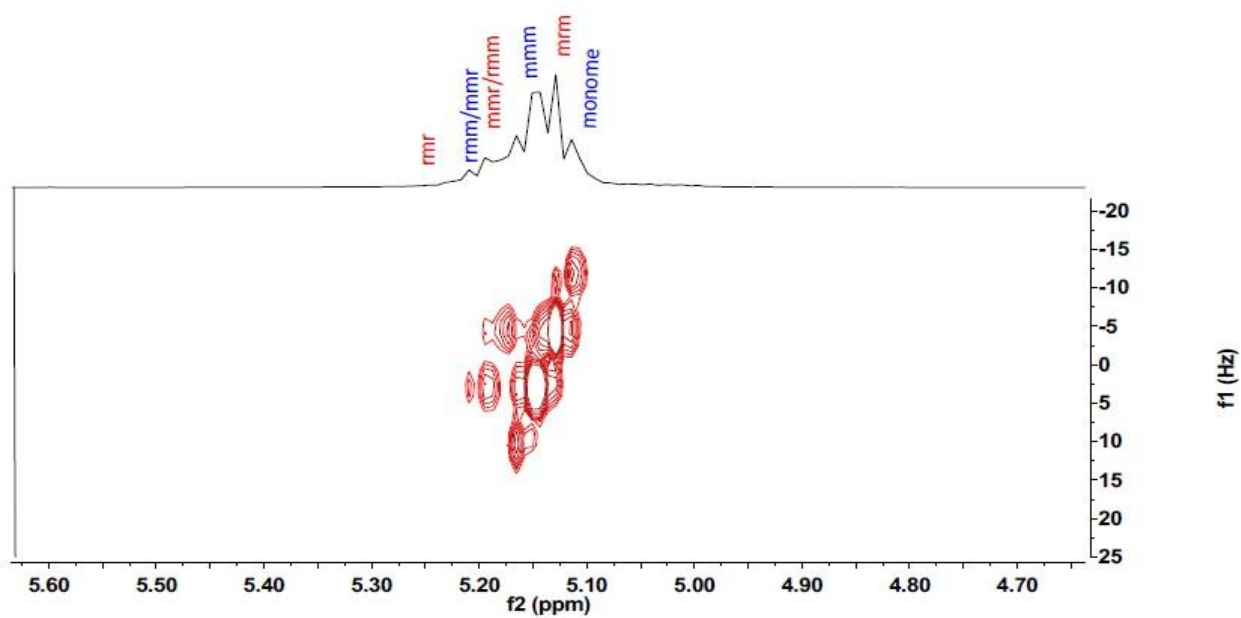

**Figure S20.** 2D J-resolved  $^1\text{H}$  NMR spectrum of PLA (run 1, table 6).

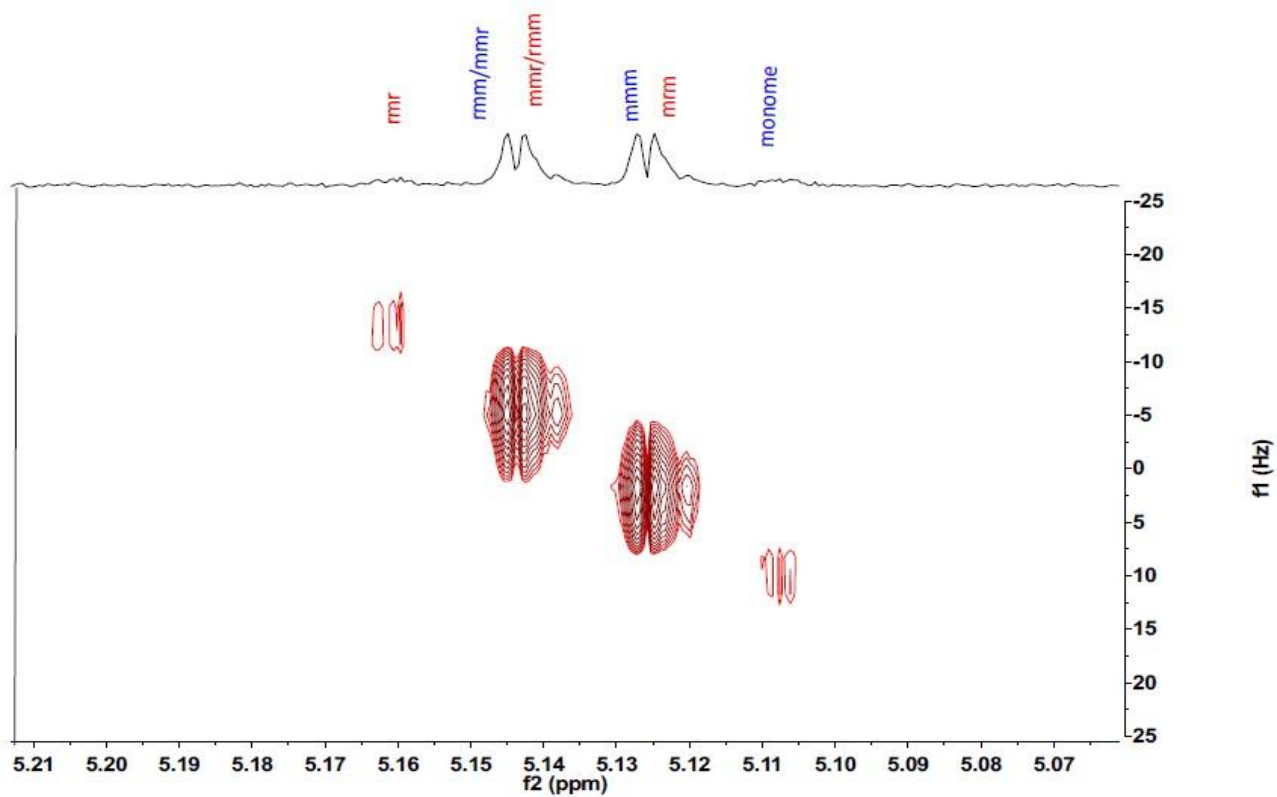

**Figure S21.** 2D J-resolved  $^1\text{H}$  NMR spectrum of PLA (run x, table 6).



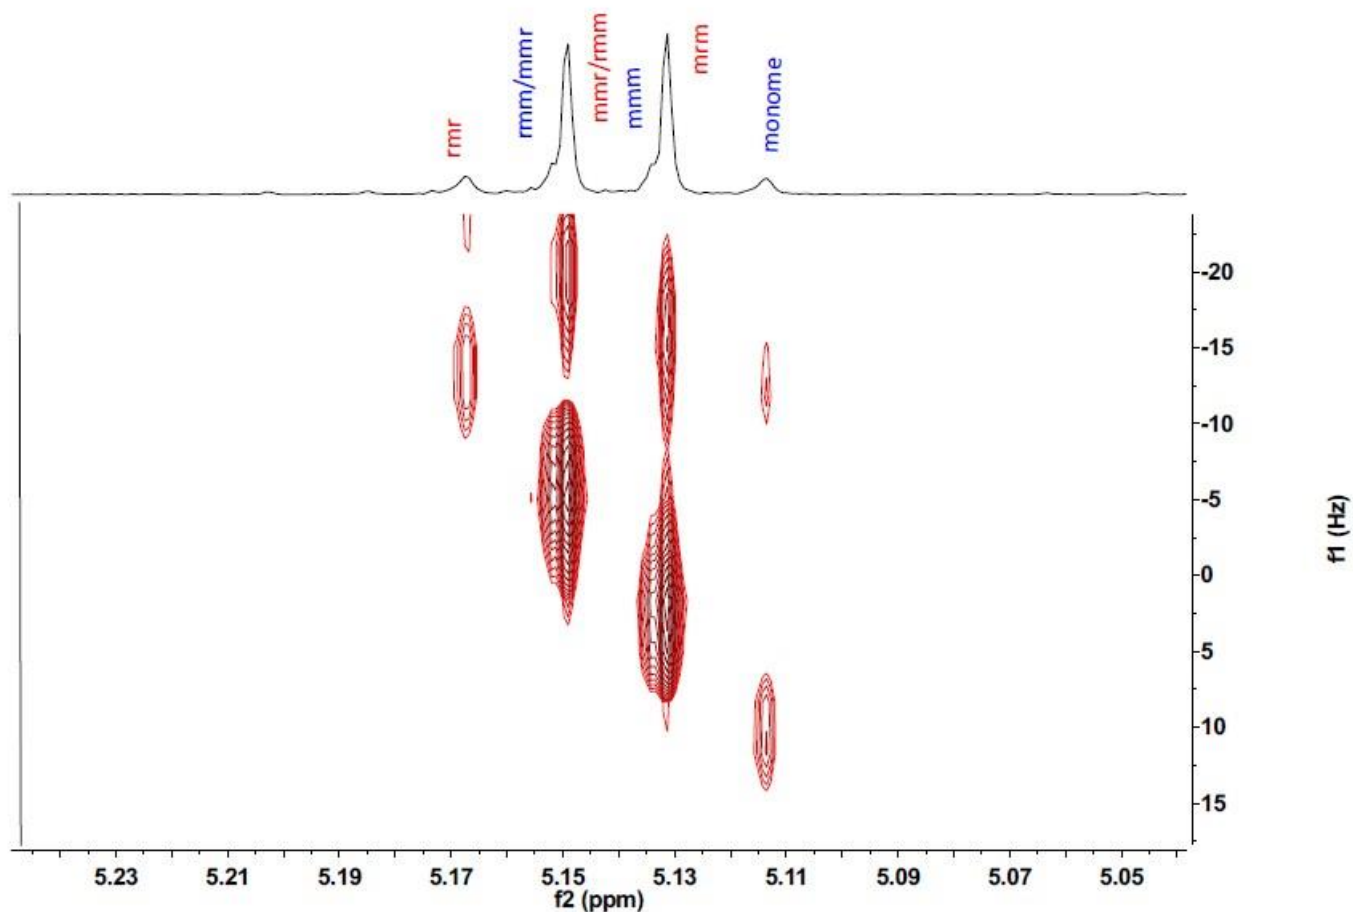

**Figure S22.** 2D J-resolved  $^1\text{H}$  NMR spectrum of PLA (run 17, table 6).

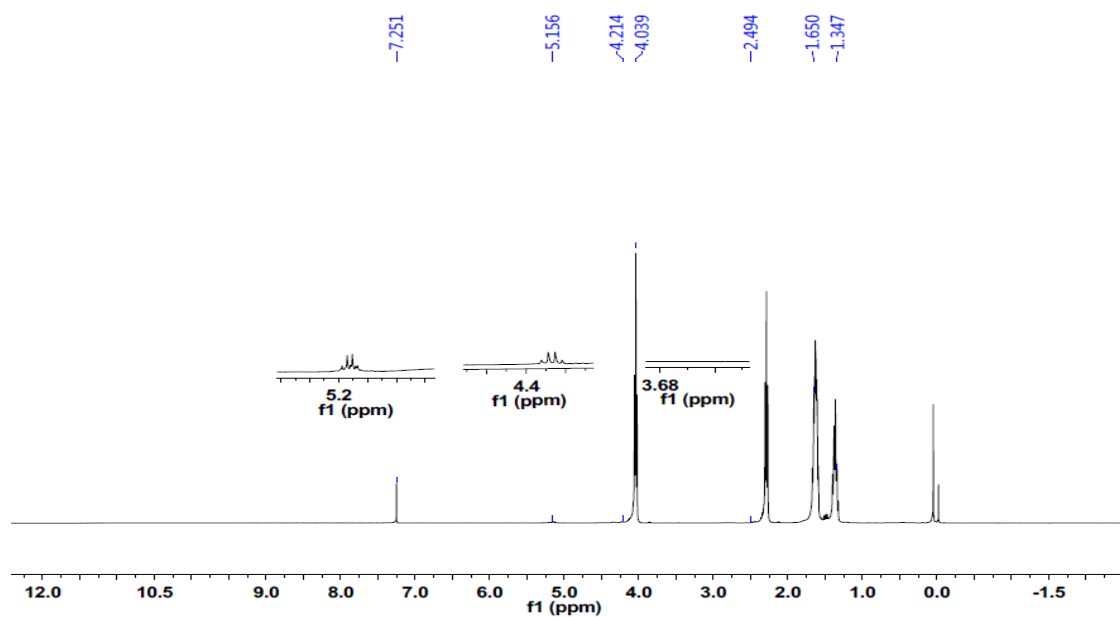

**Figure S23.**  $^1\text{H}$  NMR spectrum of co-polymer from CL and L-LA (run 4, table 7).

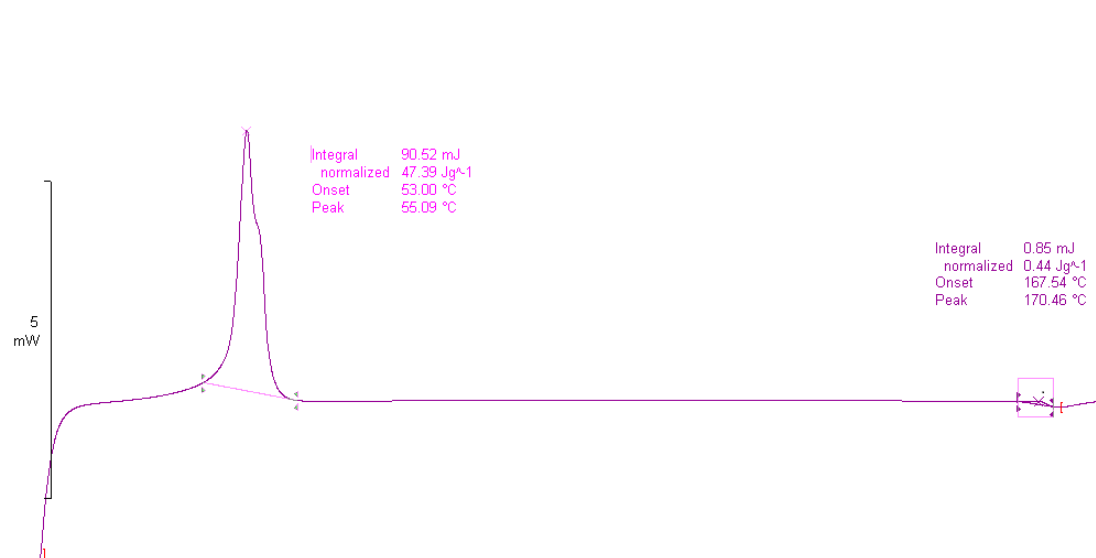

**Figure S24.** DSC plot of co-polymer from CL and *L*-LA (run 4, table 7).

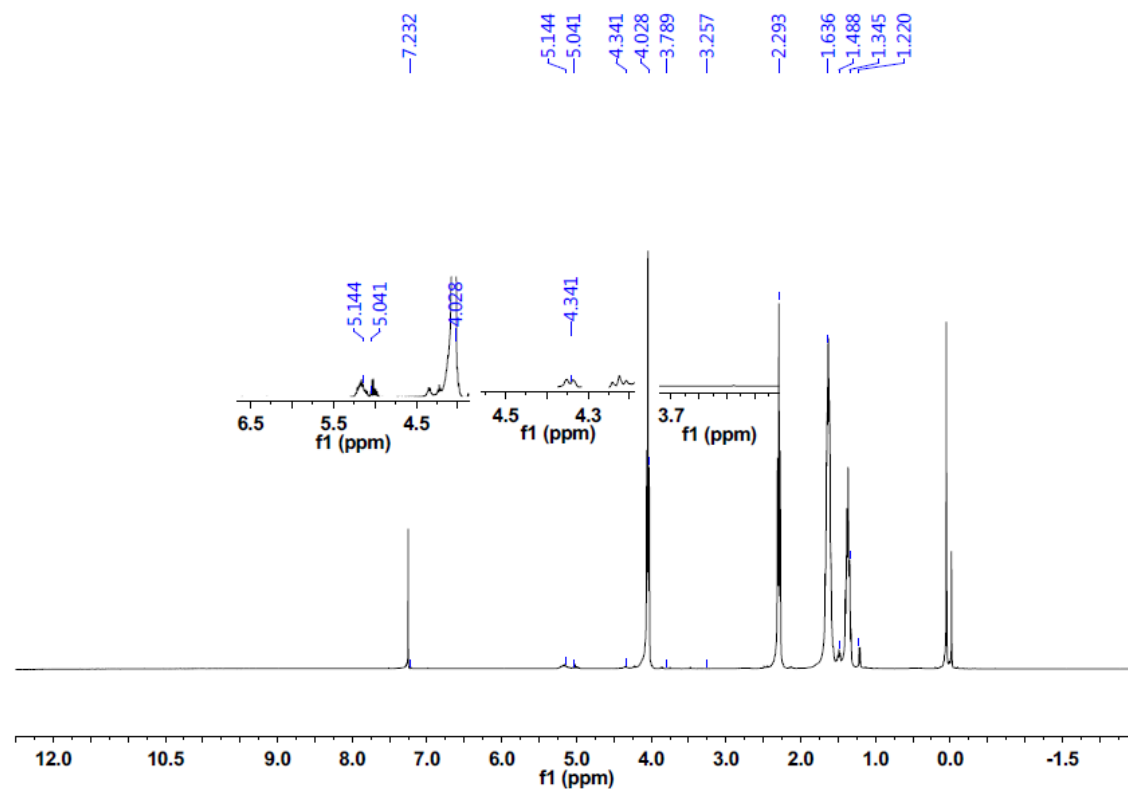

**Figure S25.** <sup>1</sup>H NMR spectrum of co-polymer from CL and *rac*-LA (run 6, table 8).

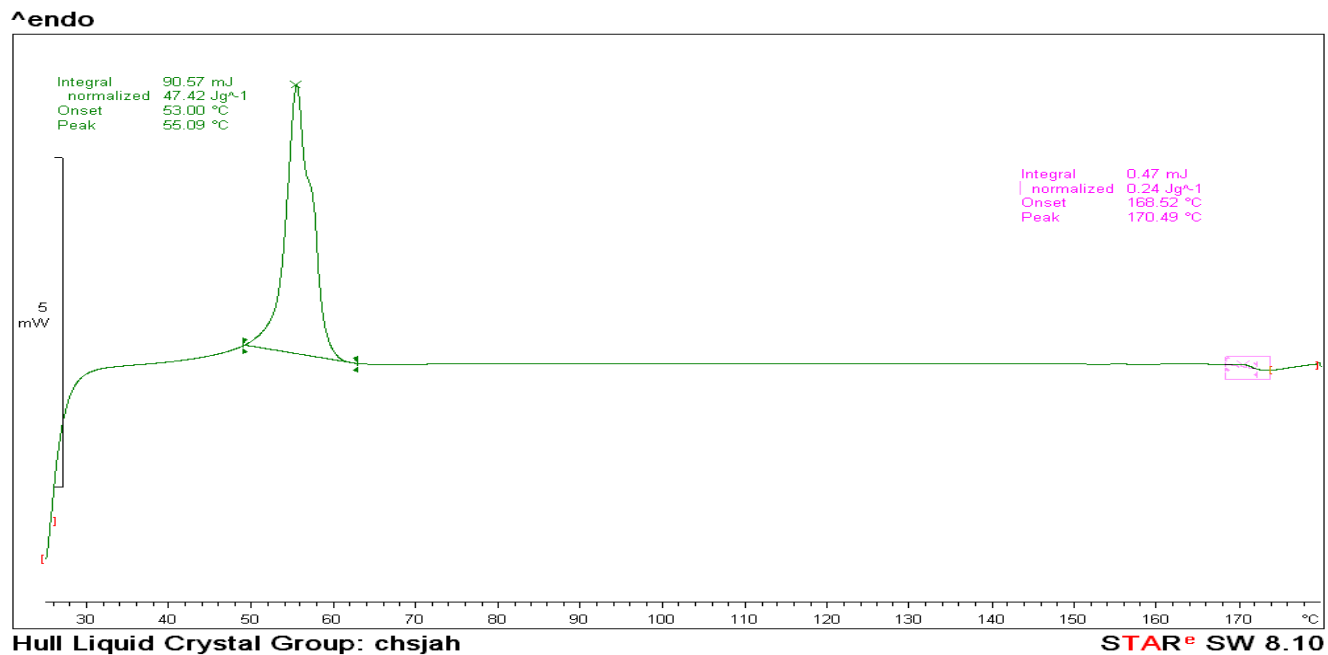

**Figure S26.** DSC plot of co-polymer from CL and *rac*-LA (run 4, table 8).

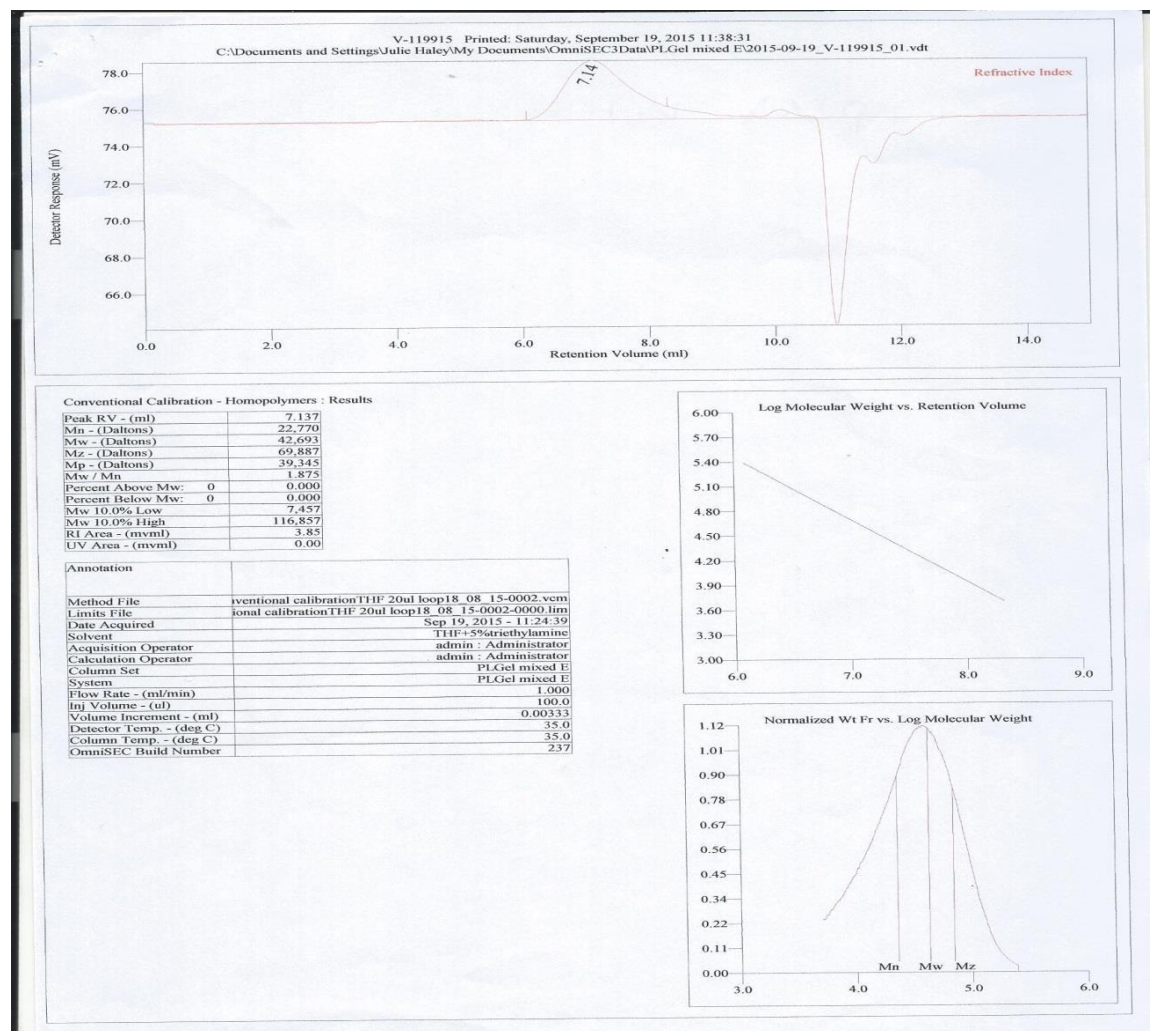

Figure S 27. GPC run 1 table 7

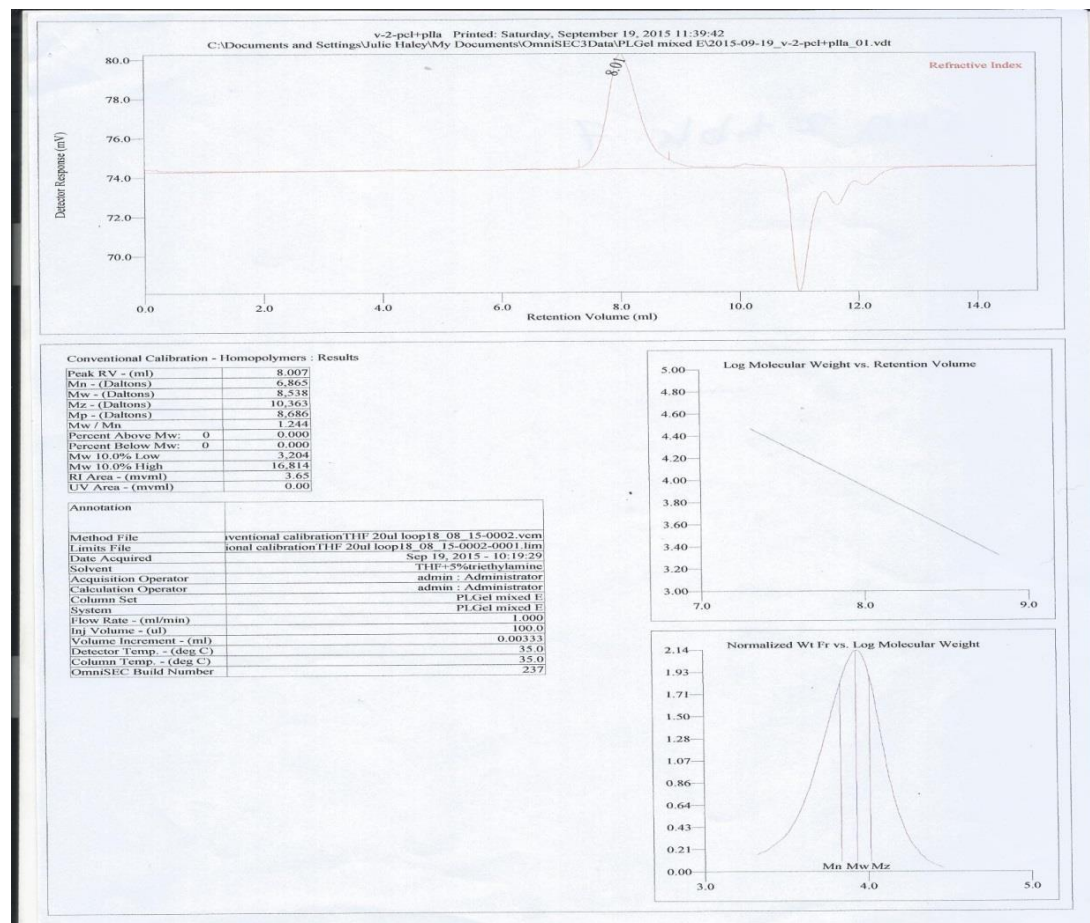

Figure S 28. GPC run 2 table 7

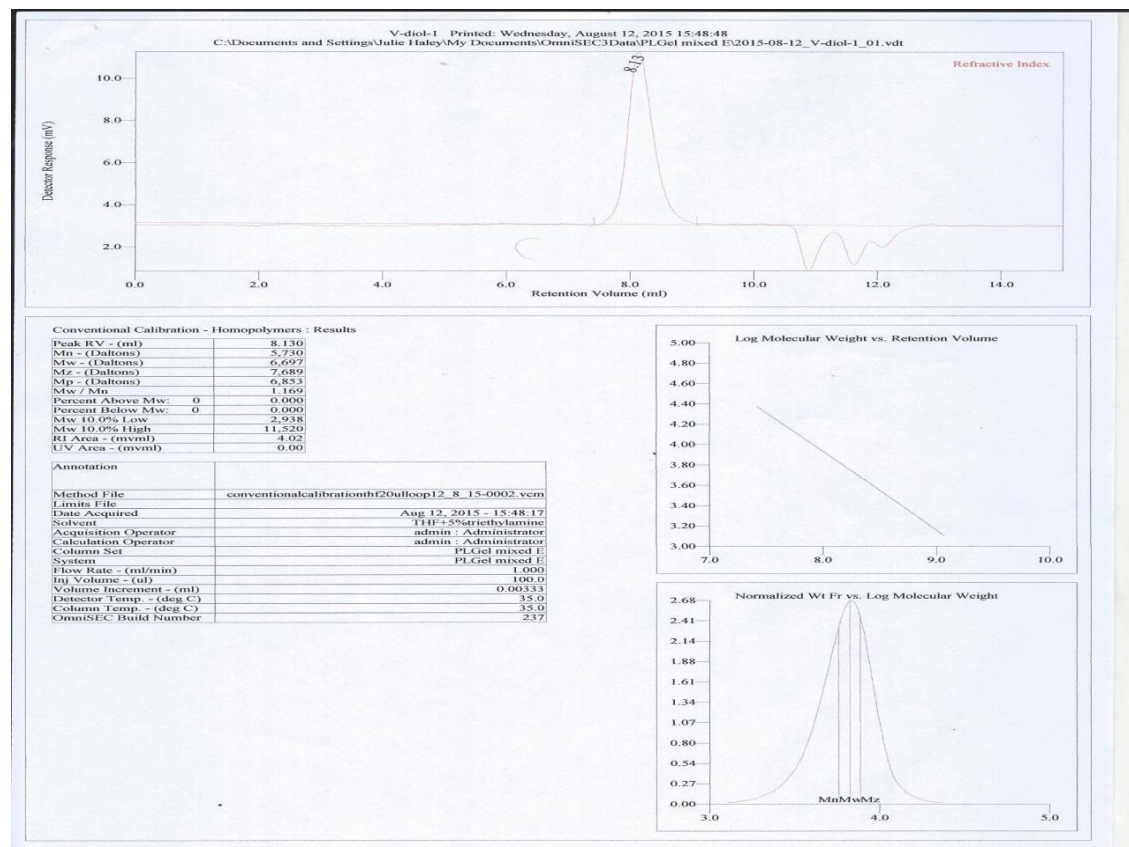

Figure S 29. GPC run 3 table 7

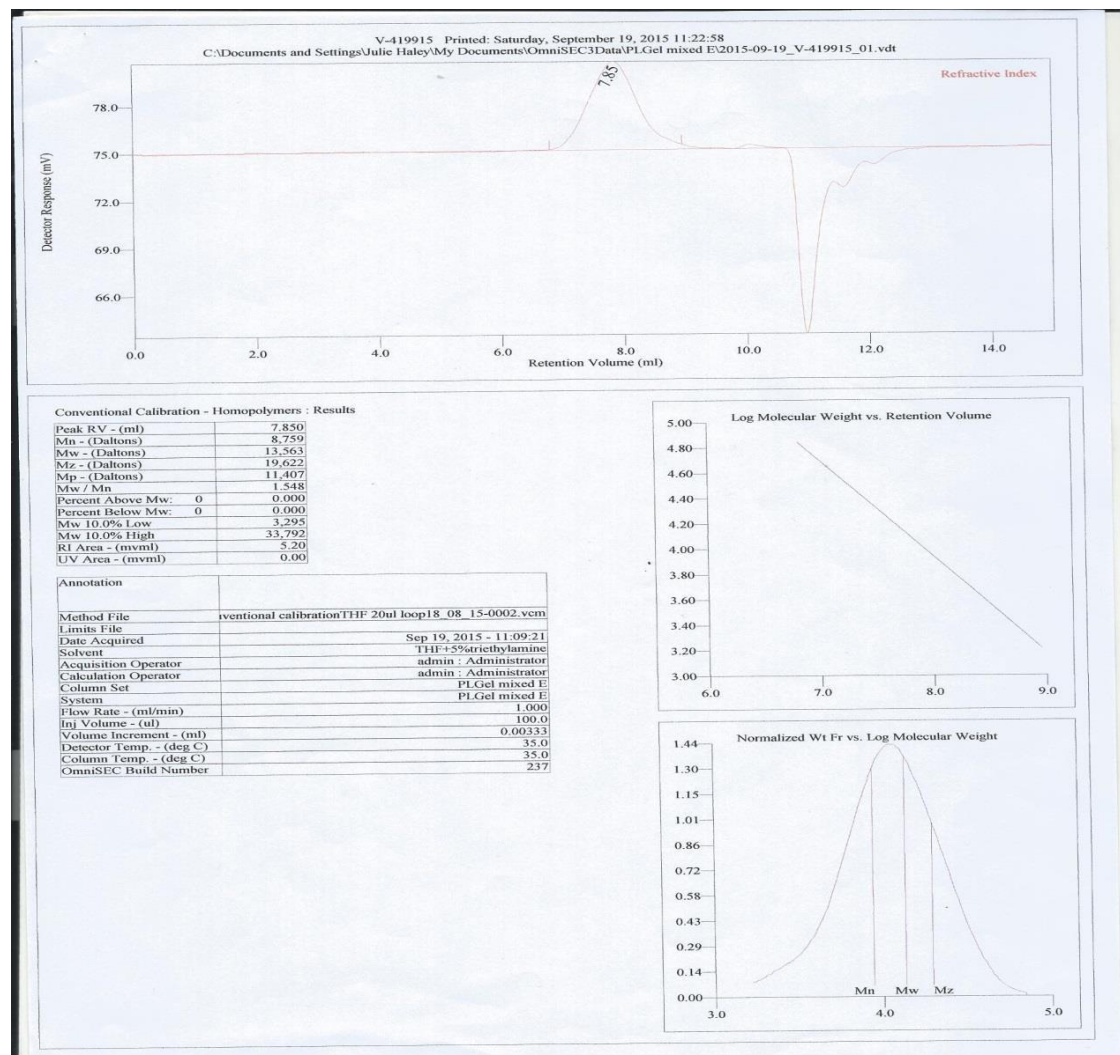

Figure S 30. GPC run 4 table 7

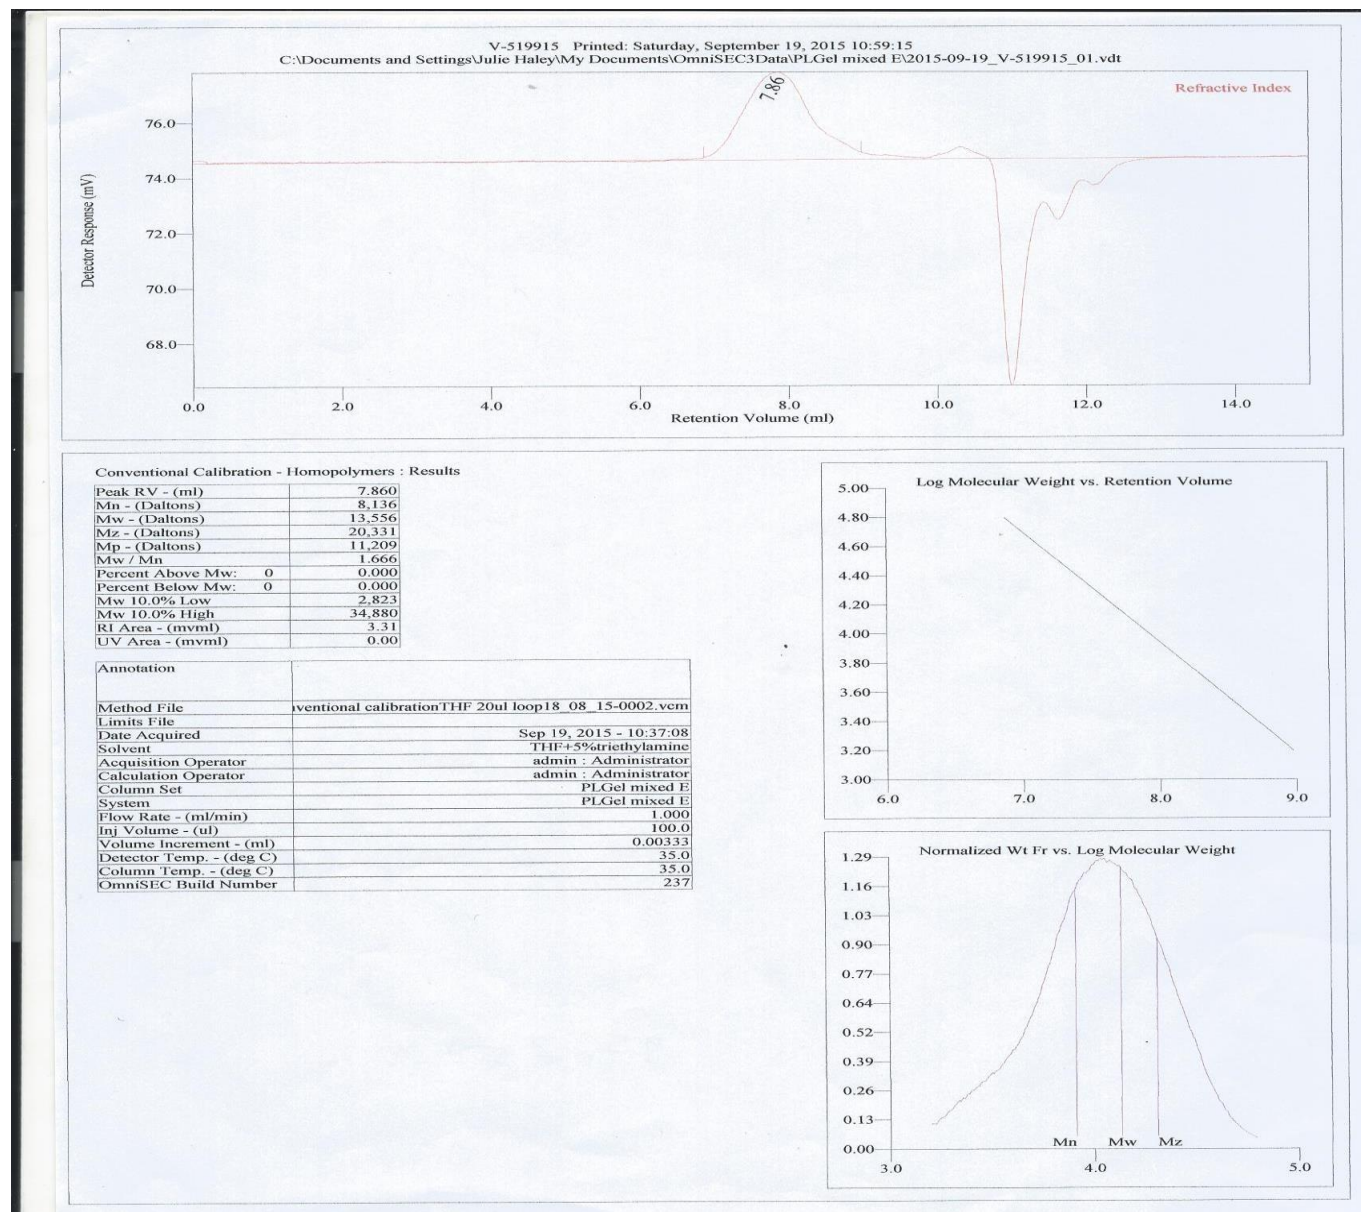

Figure S31. GPC run 5 table 7



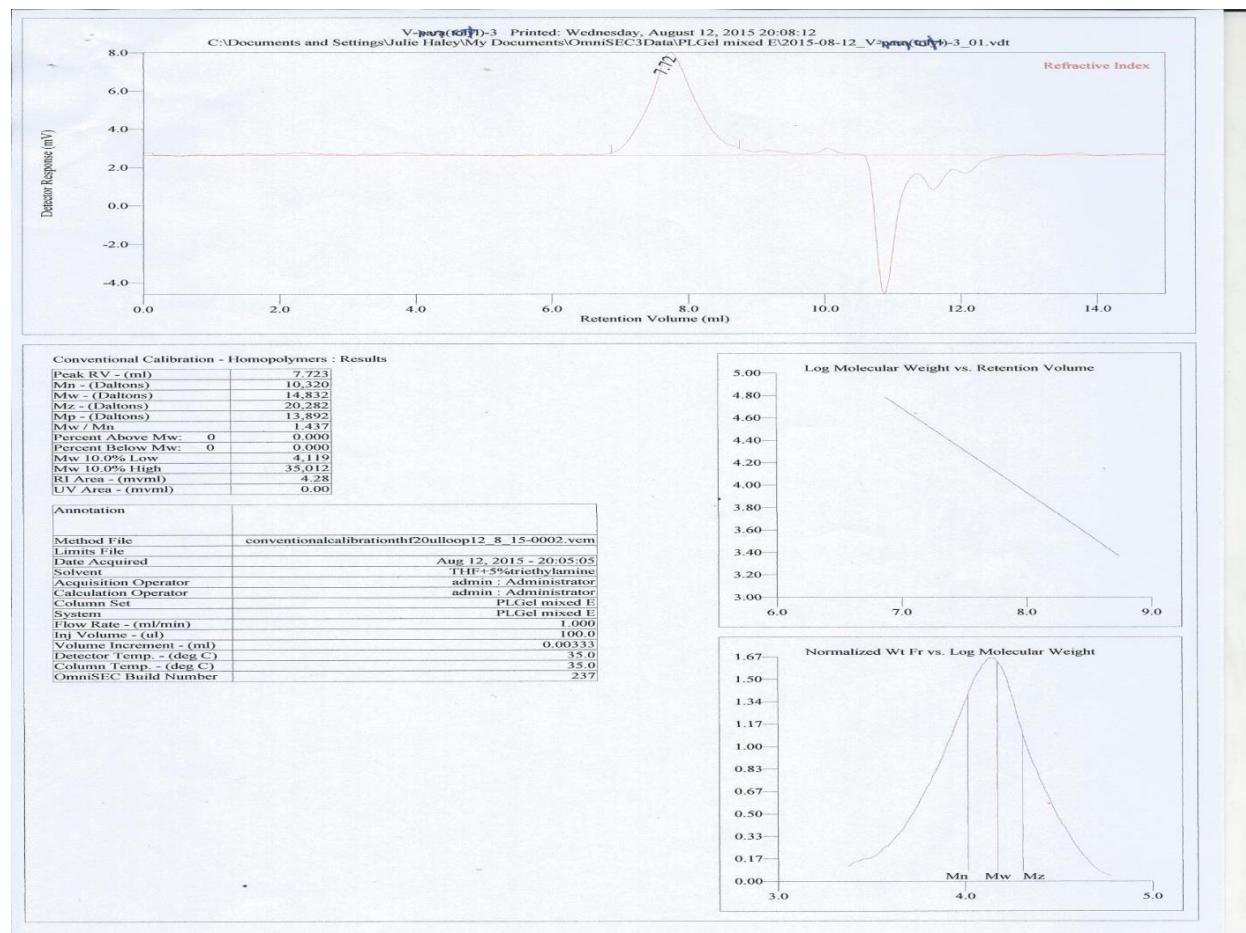

Figure S32. GPC run 6 table 7

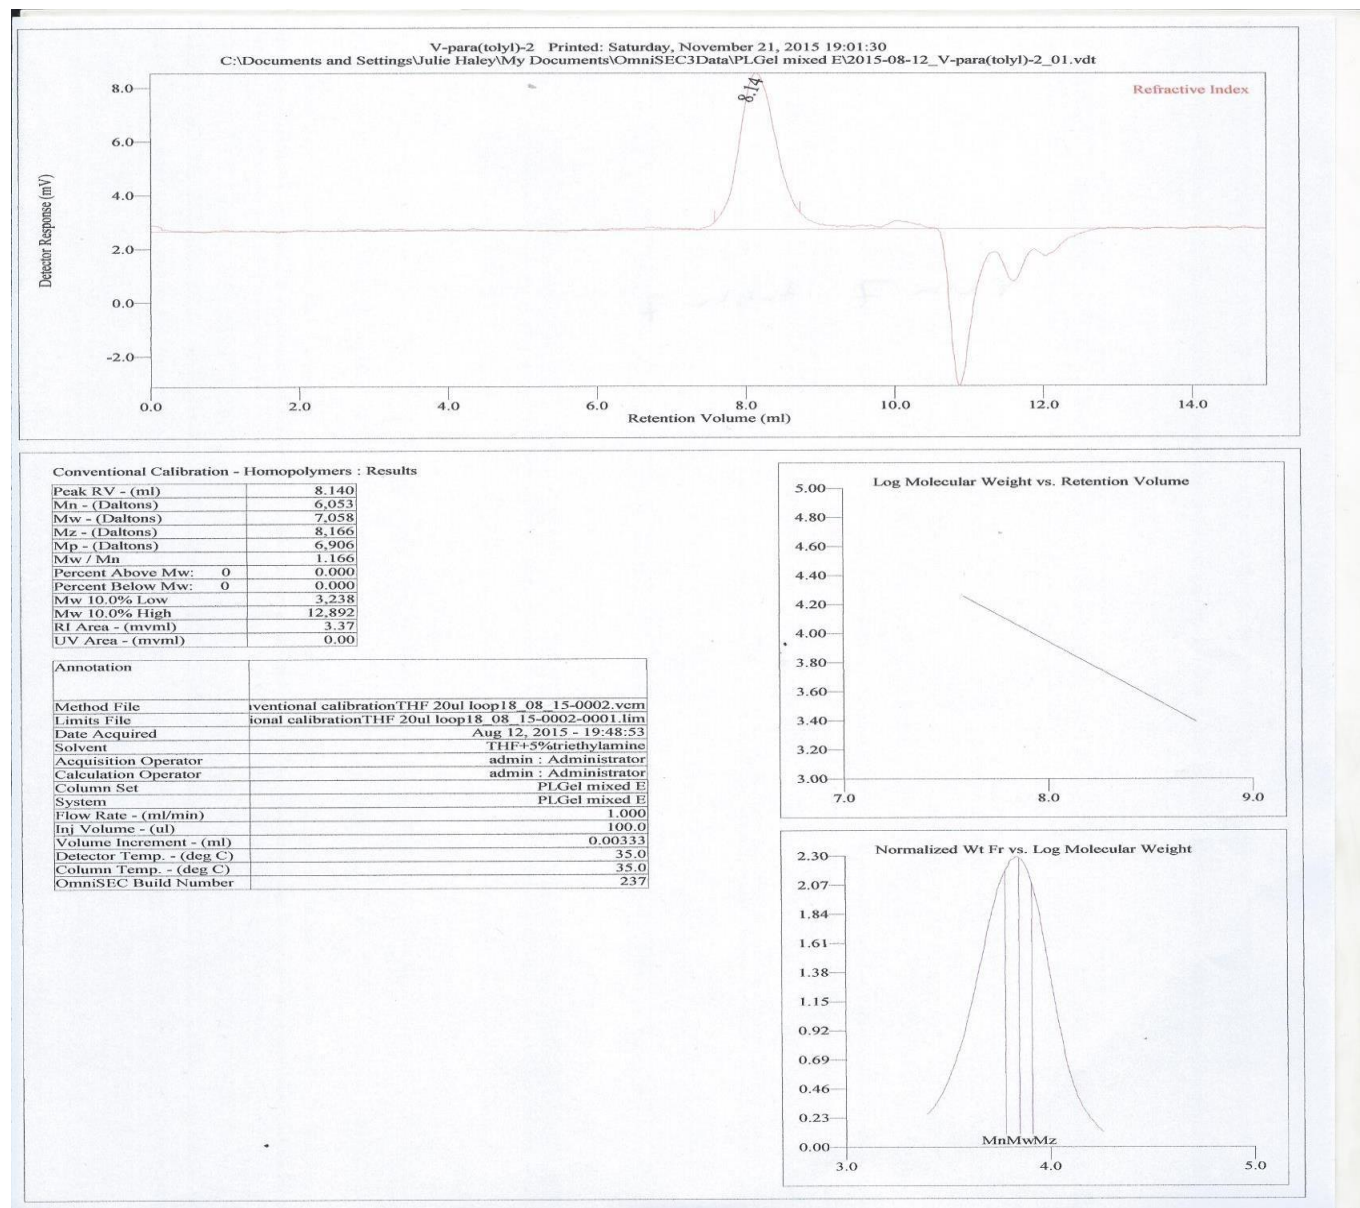

Figure S33. GPC run 7 table 7

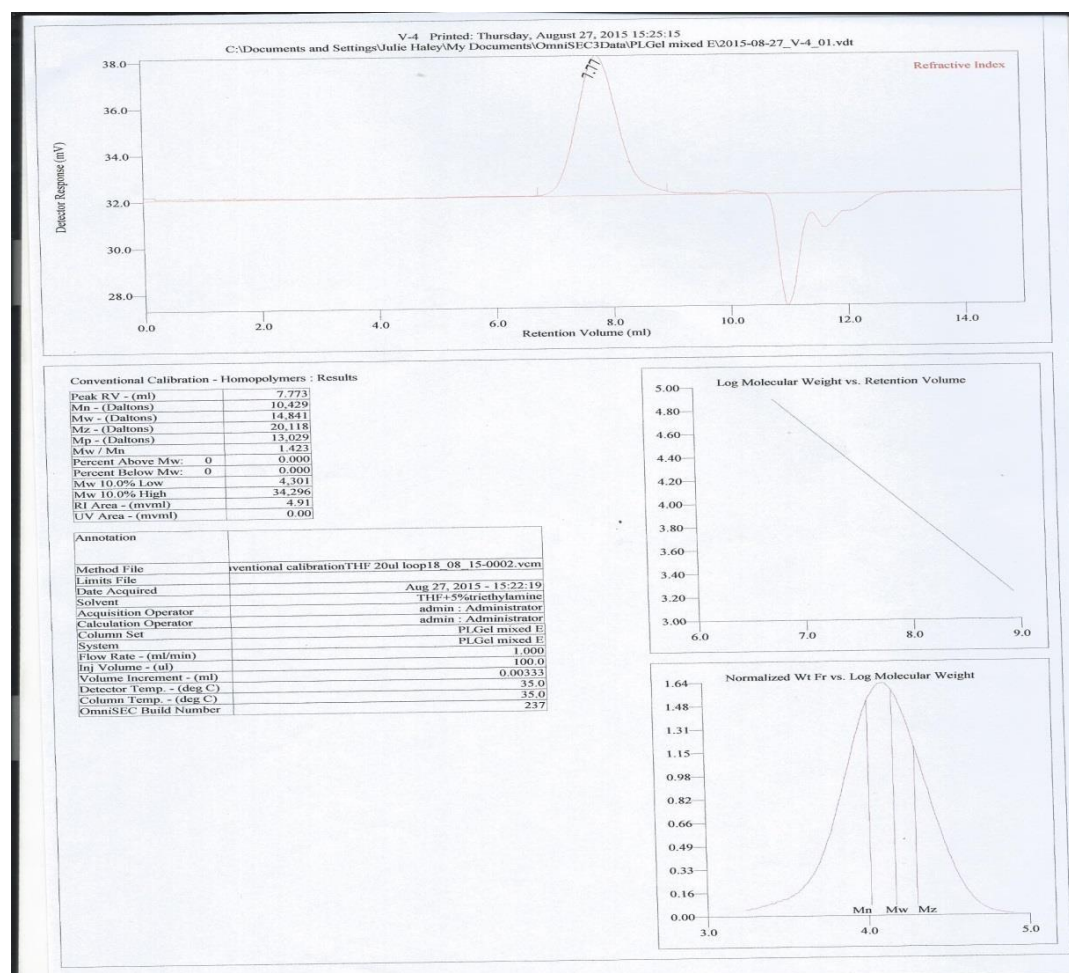

Figure S34. GPC run 1 table 8

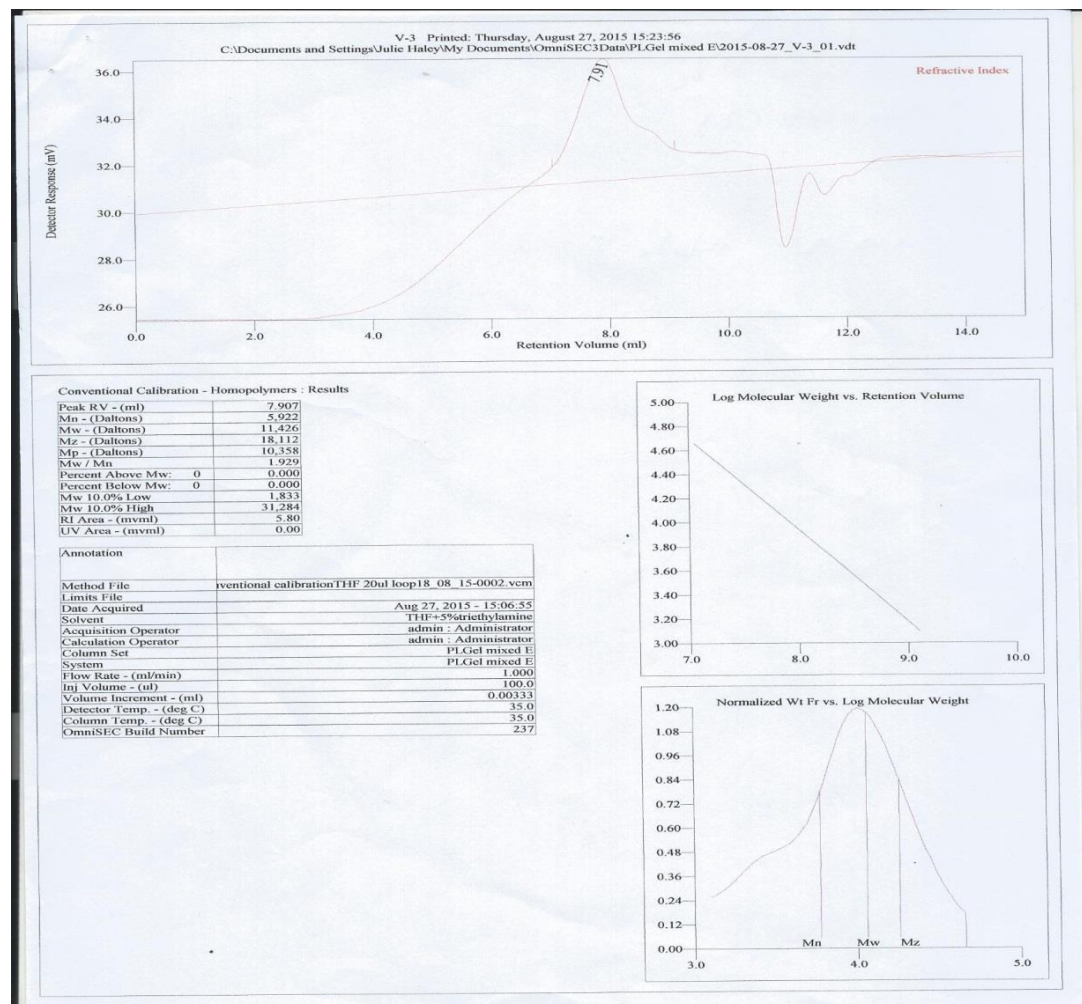

Figure S35. GPC run 2 table 8

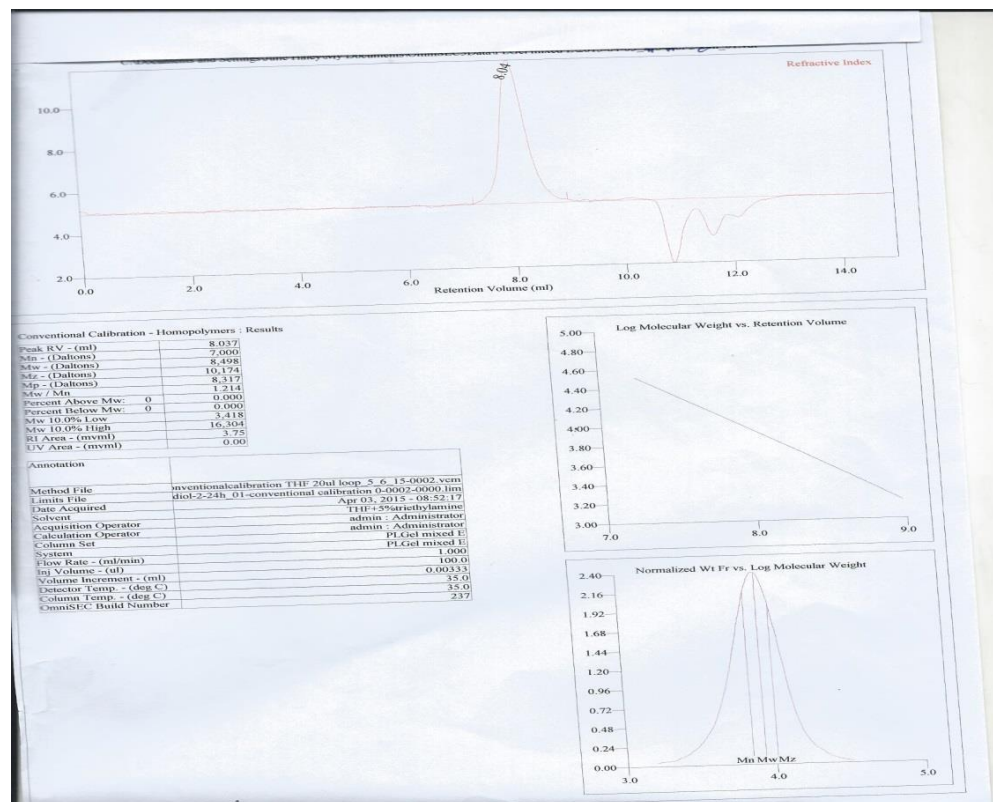

Figure S36. GPC run 3 table 8

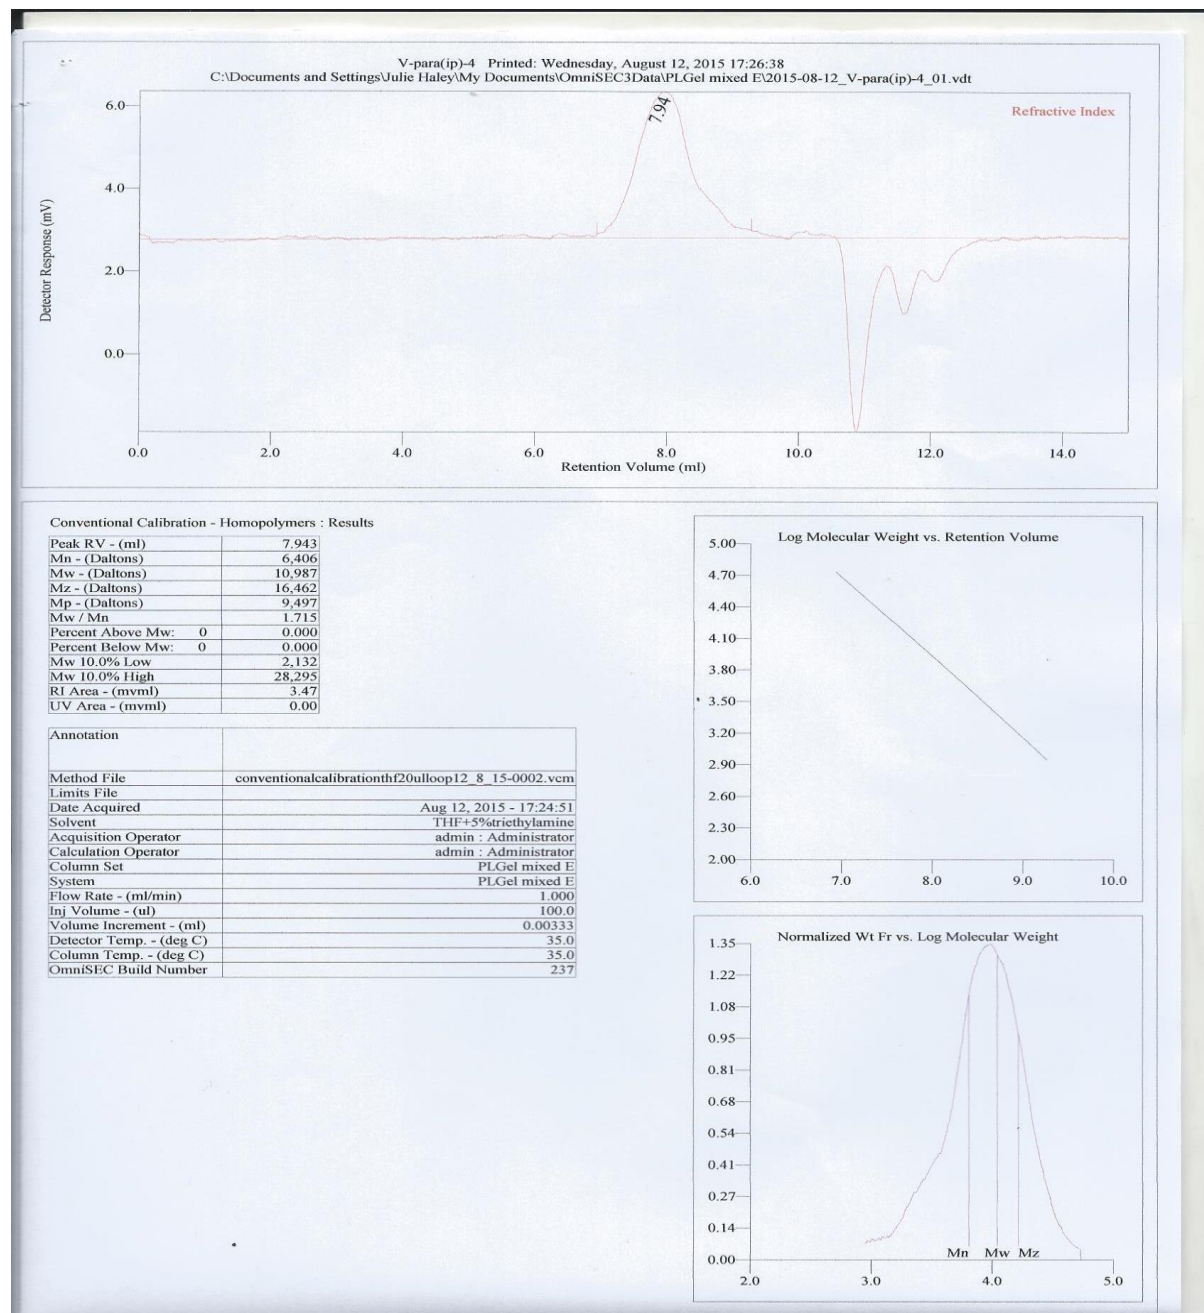

Figure S37. GPC run 4 table 8

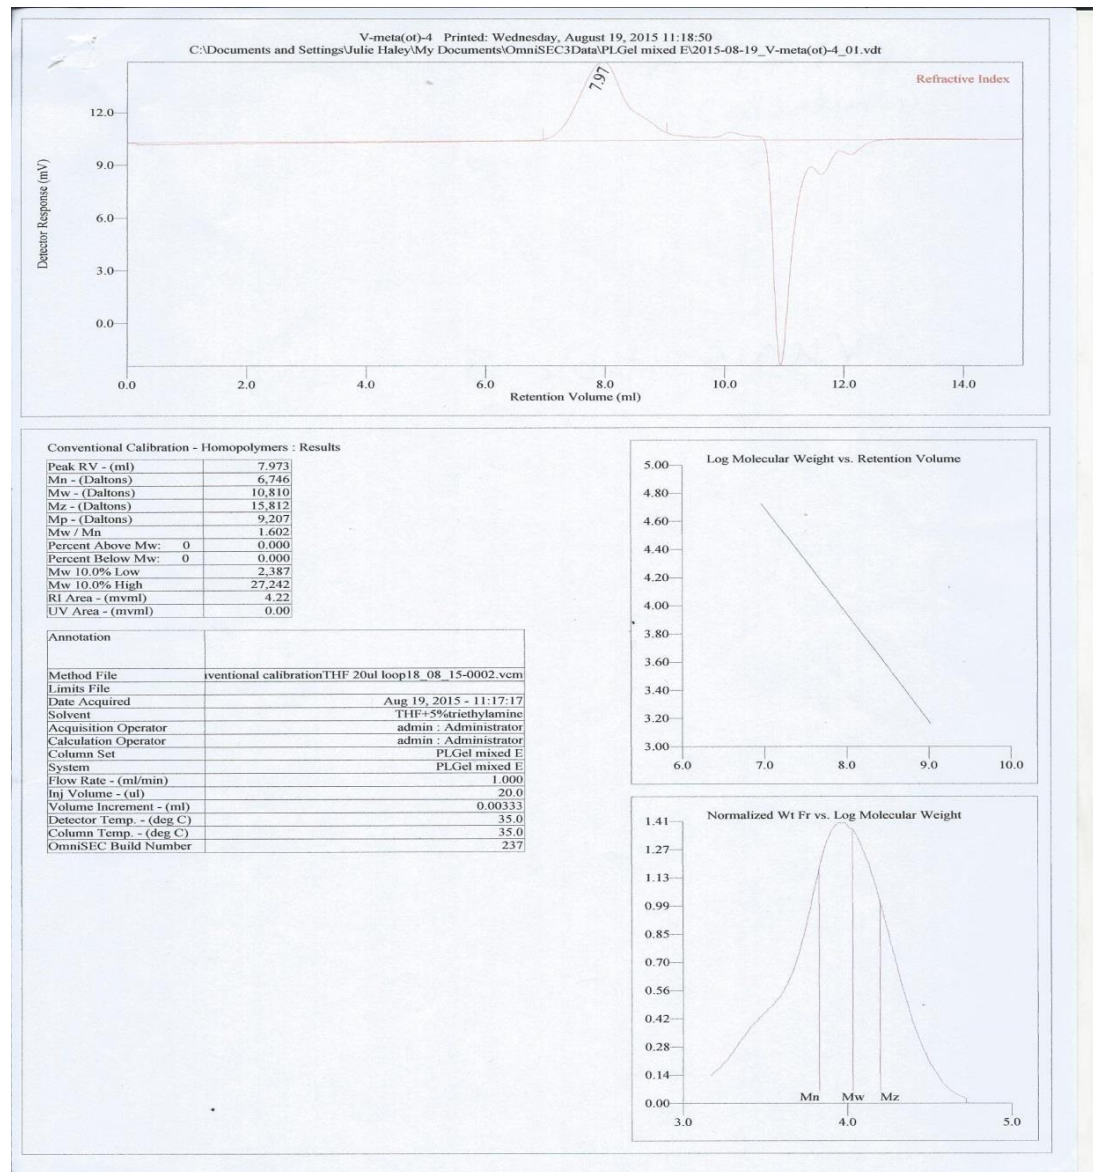

Figure S38. GPC run 5 table 8

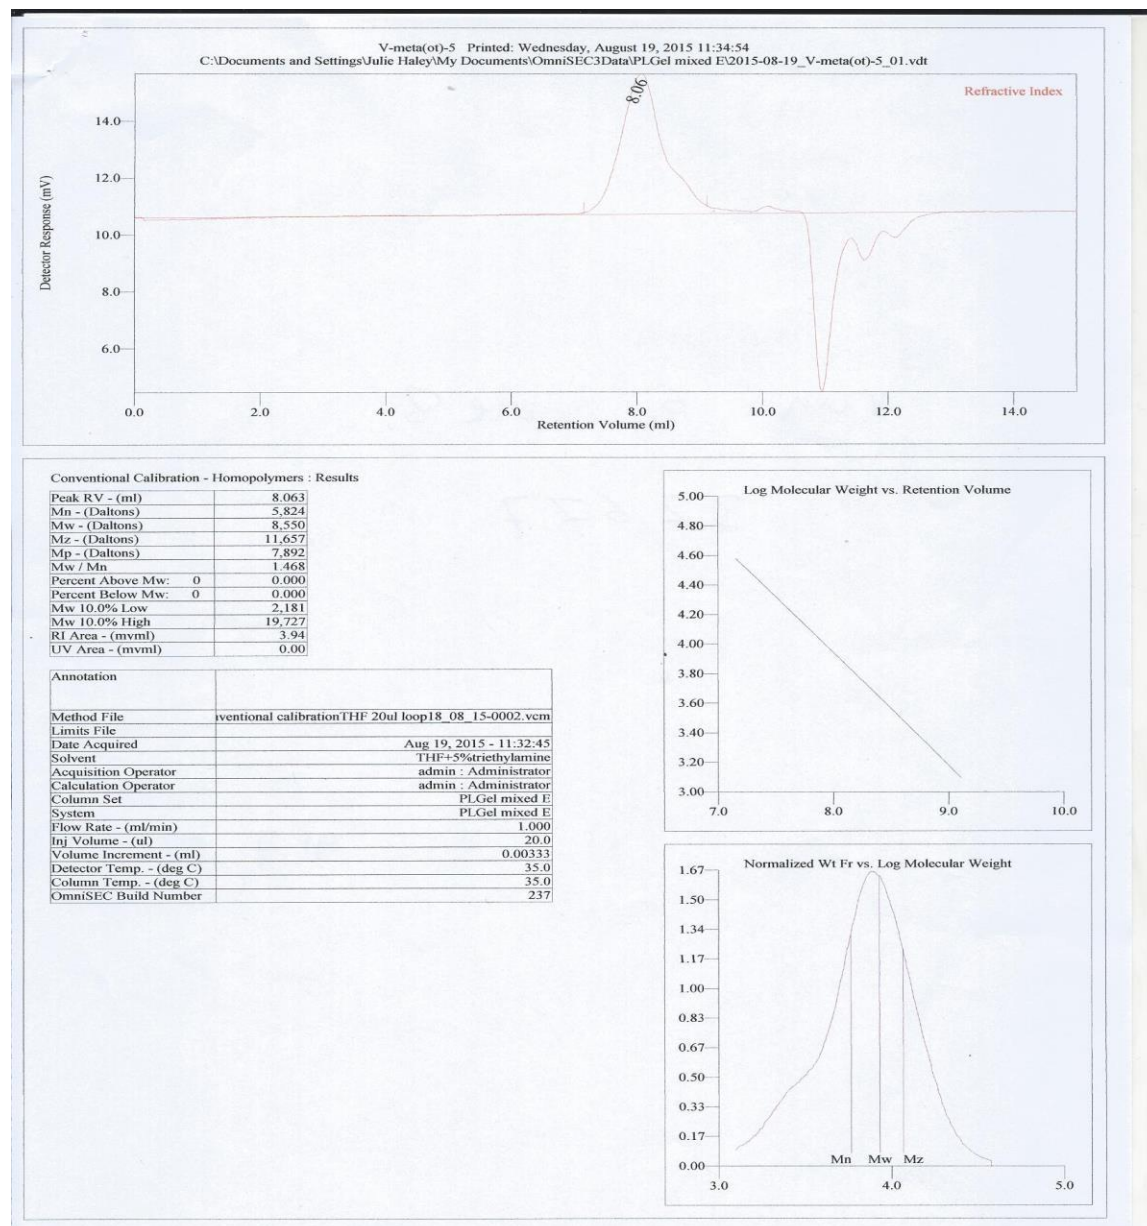

Figure S39. GPC run 6 table 8



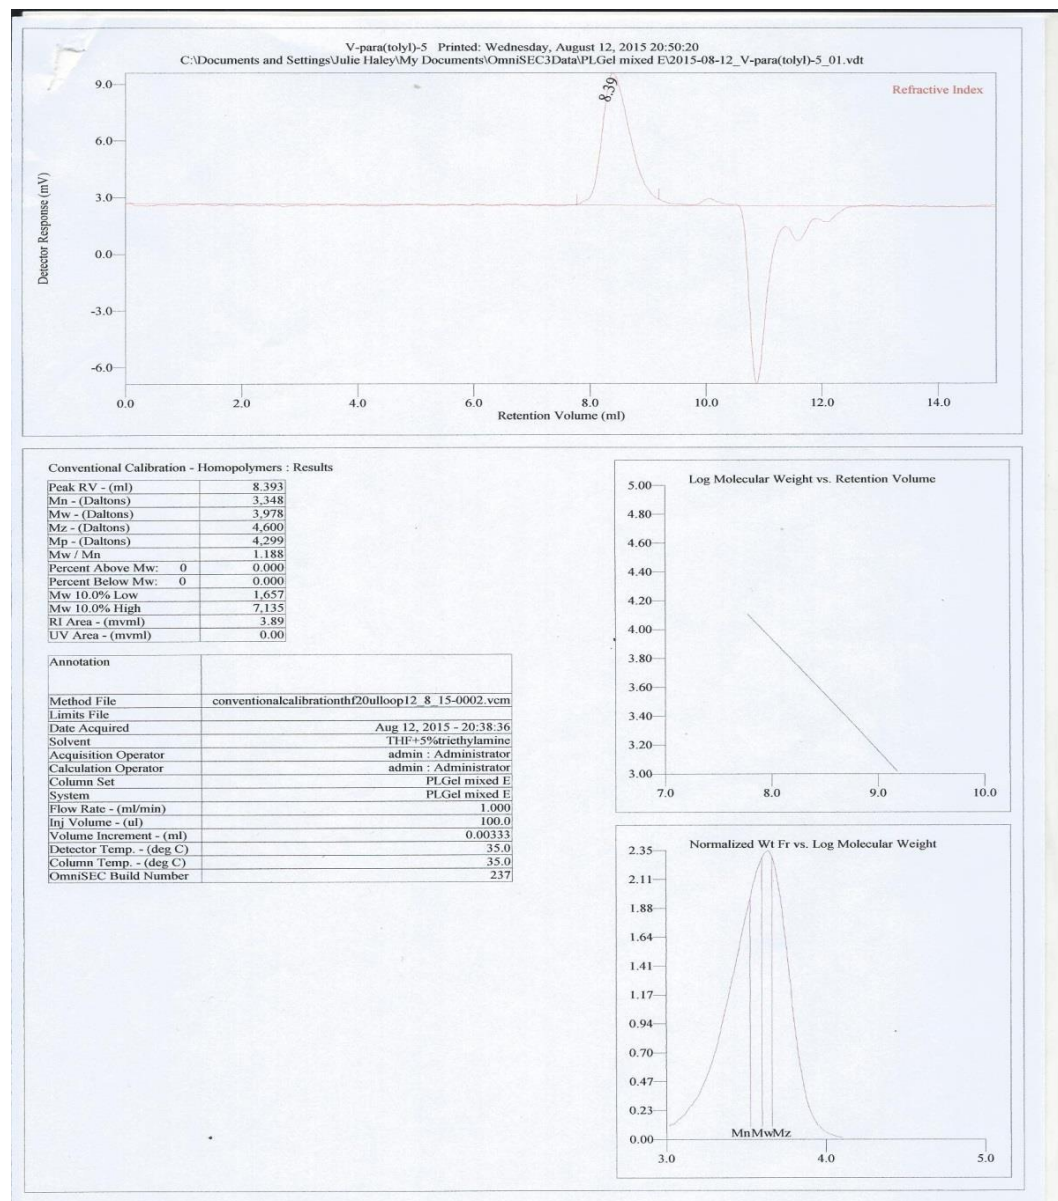

Figure S40. GPC run 7 table 8
